# Supplementary material for: Inter-facility transfers for emergency obstetrical and neonatal care in rural Madagascar: a cost-effectiveness analysis
Source: PubMed Central journal article supplement — BMJ Open. 2024 Apr 3;14(4):e081482. doi: 10.1136/bmjopen-2023-081482 (PMC11146390; doi:10.1136/bmjopen-2023-081482), 2024-04-03
Supplement: bmjopen-2023-081482.draft_revisions.pdf [file bmjopen-2023-081482.draft_revisions.pdf]

# BMJ Open

BMJ Open is committed to open peer review. As part of this commitment we make the peer review history of every article we publish publicly available.

When an article is published we post the peer reviewers' comments and the authors' responses online. We also post the versions of the paper that were used during peer review. These are the versions that the peer review comments apply to.

The versions of the paper that follow are the versions that were submitted during the peer review process. They are not the versions of record or the final published versions. They should not be cited or distributed as the published version of this manuscript.

BMJ Open is an open access journal and the full, final, typeset and author-corrected version of record of the manuscript is available on our site with no access controls, subscription charges or pay-per-view fees (<http://bmjopen.bmj.com>).

If you have any questions on BMJ Open's open peer review process please email [info.bmjopen@bmj.com](mailto:info.bmjopen@bmj.com)

# BMJ Open

## Inter-facility transfers for emergency obstetric and neonatal care in rural Madagascar: A cost-effectiveness analysis

|                               |                                                                                                                                                                                                                                                                                                                                                                                                                                                                                                                                                |
|-------------------------------|------------------------------------------------------------------------------------------------------------------------------------------------------------------------------------------------------------------------------------------------------------------------------------------------------------------------------------------------------------------------------------------------------------------------------------------------------------------------------------------------------------------------------------------------|
| Journal:                      | <i>BMJ Open</i>                                                                                                                                                                                                                                                                                                                                                                                                                                                                                                                                |
| Manuscript ID                 | bmjopen-2023-081482                                                                                                                                                                                                                                                                                                                                                                                                                                                                                                                            |
| Article Type:                 | Original research                                                                                                                                                                                                                                                                                                                                                                                                                                                                                                                              |
| Date Submitted by the Author: | 19-Nov-2023                                                                                                                                                                                                                                                                                                                                                                                                                                                                                                                                    |
| Complete List of Authors:     | Franke, Mara; Charite Medical Faculty Berlin, Nordmann, Kim; RWTH Aachen University Frühauf, Anna; Charité - Universitätsmedizin Berlin Ranaivoson, Rinja; Doctors for Madagascar Rebaliha, Mahery; Doctors for Madagascar Rapanjato, Zavaniarivo; Doctors for Madagscar Bärnighausen, Till ; Heidelberg University, Heidelberg Institute of Global Health Müller, Nadine; Charite Medical Faculty Berlin Knauss, Samuel; Charite Universitatsmedizin Berlin Emmrich, Julius; Charité - Universitätsmedizin Berlin; Institute of Global Health |
| Keywords:                     | Health economics < HEALTH SERVICES ADMINISTRATION & MANAGEMENT, NEONATOLOGY, OBSTETRICS, ACCIDENT & EMERGENCY MEDICINE                                                                                                                                                                                                                                                                                                                                                                                                                         |
|                               |                                                                                                                                                                                                                                                                                                                                                                                                                                                                                                                                                |

SCHOLARONE™  
Manuscripts

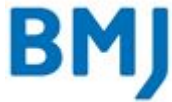

I, the Submitting Author has the right to grant and does grant on behalf of all authors of the Work (as defined in the below author licence), an exclusive licence and/or a non-exclusive licence for contributions from authors who are: i) UK Crown employees; ii) where BMJ has agreed a CC-BY licence shall apply, and/or iii) in accordance with the terms applicable for US Federal Government officers or employees acting as part of their official duties; on a worldwide, perpetual, irrevocable, royalty-free basis to BMJ Publishing Group Ltd ("BMJ") its licensees and where the relevant Journal is co-owned by BMJ to the co-owners of the Journal, to publish the Work in this journal and any other BMJ products and to exploit all rights, as set out in our [licence](#).

The Submitting Author accepts and understands that any supply made under these terms is made by BMJ to the Submitting Author unless you are acting as an employee on behalf of your employer or a postgraduate student of an affiliated institution which is paying any applicable article publishing charge ("APC") for Open Access articles. Where the Submitting Author wishes to make the Work available on an Open Access basis (and intends to pay the relevant APC), the terms of reuse of such Open Access shall be governed by a Creative Commons licence – details of these licences and which [Creative Commons](#) licence will apply to this Work are set out in our licence referred to above.

Other than as permitted in any relevant BMJ Author's Self Archiving Policies, I confirm this Work has not been accepted for publication elsewhere, is not being considered for publication elsewhere and does not duplicate material already published. I confirm all authors consent to publication of this Work and authorise the granting of this licence.

1  
2  
3  
4 **1 TITLE**

5  
6 **2 Inter-facility transfers for emergency obstetric and neonatal care in rural Madagascar:**  
7  
8 **3 A cost-effectiveness analysis**

9  
10  
11  
12 **4 AUTHORS**

13  
14  
15 **5 Mara Anna Franke<sup>1,2</sup>, Kim Nordmann<sup>2,3</sup>, Anna Frühauf<sup>1,2</sup>, Rinja Mitolotra Ranaivoson<sup>4</sup>,**  
16  
17 **6 Mahery Rebalih<sup>4</sup>, Zavaniarivo Rapanjato<sup>4</sup>, Till Bärnighausen<sup>5,6,7,8</sup>, Nadine Muller<sup>2,5,9</sup>,**  
18  
19 **7 Samuel Knauss<sup>1,2,5,10,11\*</sup>, Julius Valentin Emmrich<sup>1,2,5,10,11\*</sup>**

20  
21  
22  
23 **8 Affiliations**

- 24  
25  
26  
27 9 1) Charité Global Health, Charité - Universitätsmedizin Berlin, Berlin, Germany  
28  
29 10 2) Ärzte für Madagaskar, Berlin, Germany  
30  
31 11 3) RWTH Aachen University, Aachen, Germany  
32  
33 12 4) Doctors for Madagascar, Antananarivo, Madagascar  
34  
35 13 5) Medical Faculty, University of Heidelberg, Institute of Global Health, Heidelberg,  
36  
37 Germany  
38  
39 14 6) University of Heidelberg, University Hospital, Heidelberg, Germany  
40  
41 15 7) Department of Global Health and Population, Chan School of Public Health, Boston,  
42  
43 16 Massachusetts, USA  
44  
45 17 8) Africa Health Research Institute, Somkhele and Durban, South Africa  
46  
47 18 9) Department of Infectious Diseases, Charité – Universitätsmedizin Berlin  
48  
49 19 10) Berlin, Germany; Berlin Institute of Health, Berlin, Germany  
50  
51 20 11) Department of Neurology with Experimental Neurology, Charité —  
52  
53  
54 21  
55  
56 22  
57  
58  
59  
60 23  
24  
25  
26  
27  
28  
29  
30  
31  
32  
33  
34  
35  
36  
37  
38  
39  
40  
41  
42  
43  
44  
45  
46  
47  
48  
49  
50  
51  
52  
53  
54  
55  
56  
57  
58  
59  
60

1  
2  
3 **24 Corresponding author**  
4  
5

6 **25** PD Dr. Julius Valentin Emmrich, Charité - Universitätsmedizin Berlin, Charitéplatz 1, 1107  
7  
8 **26** Berlin, Germany; E-Mail: [julius.emmrich@charite.de](mailto:julius.emmrich@charite.de)  
9  
10

11 **27 ABSTRACT**  
12  
13  
14

15 **28** *Context:* There is a substantial lack of inter-facility referral systems for emergency obstetric  
16  
17 **29** and neonatal care in rural areas of sub-Saharan Africa. Data on the costs and cost-  
18  
19 **30** effectiveness of such systems that reduce preventable maternal and neonatal deaths are  
20  
21 **31** scarce.  
22  
23  
24

25 **32** *Setting:* We aimed to determine the cost-effectiveness of an NGO-run inter-facility referral  
26  
27 **33** system for emergency obstetric and neonatal care in rural southern Madagascar by analyzing  
28  
29 **34** the characteristics of cases referred through the intervention as well as its costs.  
30  
31  
32

33 **35** *Design:* We used secondary NGO data, drawn from an NGO's monitoring and financial  
34  
35 **36** administration database, including medical and financial records.  
36  
37  
38

39 **37** *Outcome measures:* We performed a descriptive and a cost-effectiveness analysis, including a  
40  
41 **38** one-way deterministic sensitivity analysis.  
42  
43

44 **39** *Results:* 1,172 cases were referred over a period of 4 years, with an estimated referral cost of  
45  
46 **40** 336 USD and an incremental cost-effectiveness ratio (ICER) of 70 USD per additional life  
47  
48 **41** year saved (undiscounted, discounted 137 USD). The sensitivity analysis showed that the  
49  
50 **42** intervention was cost-effective for all scenarios with the lowest ICER at 99 USD and the  
51  
52 **43** highest ICER at 205 USD per additional life year saved. When extrapolated to the population  
53  
54 **44** living in the study area, the investment costs of the program were 0.13 USD per person and  
55  
56 **45** annual running costs 0.06 USD per person.  
57  
58  
59  
60

1  
2  
3 46 *Conclusions:* In our study, the inter-facility referral system was a very cost-effective  
4  
5 47 intervention. Our findings may inform policies, decision making, and implementation  
6  
7 48 strategies for emergency obstetric and neonatal care referral systems in similar resource-  
8  
9 49 constrained settings.

## 13 50 **ARTICLE SUMMARY**

### 16 51 **Strengths and limitations of this study**

- 19 52 • Strength: Large study sample from a widely understudied population in remote Southern  
20  
21 53 Madagascar
- 23 54 • Limitation: Programmatic data and reliance of expert panel process for defining survival  
24  
25 55 rates
- 27 56 • Limitation: No long-term follow up data of patients available due to cross-sectional  
28  
29 57 nature of the study.
- 31 58 • Strength: Robust CEA methodology, including detailed and comprehensive costing data

### 36 59 **KEYWORDS**

38 60 Sub-Saharan Africa, maternal health, Emergency obstetric and neonatal care, cost-  
39  
40 61 effectiveness analysis

### 44 62 **FUNDING STATEMENT**

46 63 This research received no specific grant from any funding agency in the public, commercial  
47  
48 64 or not-for-profit sectors.

### 52 65 **CONFLICT OF INTERESTS**

54 66 The authors declare no conflicts of interest.

### 58 67 **DATA SHARING**

59  
60 68 The original data are available from the corresponding author upon reasonable request.

1  
2  
3  
4  
5  
6  
7  
8  
9  
10  
11  
12  
13  
14  
15  
16  
17  
18  
19  
20  
21  
22  
23  
24  
25  
26  
27  
28  
29  
30  
31  
32  
33  
34  
35  
36  
37  
38  
39  
40  
41  
42  
43  
44  
45  
46  
47  
48  
49  
50  
51  
52  
53  
54  
55  
56  
57  
58  
59  
60

69 **WORD COUNT**

70 3,344

For peer review only

## 71 **BACKGROUND**

72 Reducing the global maternal mortality ratio to less than 70 per 100,000 live births by 2030 is  
73 a key target of the Sustainable Development Goals (1). Haemorrhage, sepsis, unsafe abortion,  
74 and other complications of delivery account for more than 50% of maternal deaths in sub-  
75 Saharan Africa (SSA) (2). Most neonatal deaths in SSA are attributable to either intrapartum  
76 complications or complications linked to preterm delivery (3). Many of these fatalities are  
77 preventable through access to timely and high-quality emergency obstetric care (EmOC).

78 However, mothers and neonates in SSA often experience significant delays in accessing  
79 EmOC services, i.e., when deciding to seek, reaching, and receiving adequate care (4).  
80 Access to and availability of adequate means of transportation, including ambulance referral  
81 services to EmOC centres, reduces these delays (5,6), which, in turn, reduces maternal and  
82 neonatal mortality (7,8).

83 The implementation of ambulance referral systems for EmOC services in SSA have been  
84 described for several, mostly rural contexts, including in Uganda (9,10), Burundi (11), and  
85 Ethiopia (12). They mostly differed in the type of referral service provided (i.e., from home  
86 to health facility versus inter-facility referral) and the level of medical support provided to  
87 patients during referrals. Only a minority of these programs have been evaluated through a  
88 cost-effectiveness analysis (9, 12).

89 Africa's health financing gap is estimated at 66 billion USD annually and the financing need  
90 for maternal and child health services is particularly acute (13,14). Thus, reliable data on  
91 costs and cost-effectiveness of ambulance programs are essential for designing and  
92 prioritizing maternal health interventions in SSA.

93 We aimed to describe case and service characteristics as well as analyse the costs and cost-  
94 effectiveness of an EmOC inter-facility referral system established by a non-governmental



1  
2  
3 95 organization (NGO) in rural Madagascar. Our findings may inform policies, decision making  
4  
5 96 and implementation strategies for EmOC referral systems in resource-constrained settings.  
6  
7  
8  
9

10  
11 97

## 12 98 **METHODS**

### 13 14 15 99 **Study design**

16  
17  
18 100 This is a retrospective study using secondary data, routinely collected as part of an NGO  
19  
20 101 intervention. A data-sharing agreement with the NGO was in place.  
21  
22  
23

### 24 102 **Study area and context**

25  
26  
27 103 The study took place in Atsimo-Andrefana, Androy, and Anosy, rural regions in the South of  
28  
29 104 Madagascar. Poverty rates in the study region are high with over 80% of the population living  
30  
31 105 of less than 1.90\$ per day (15). Nationally, neonatal, and maternal mortality ratios remain  
32  
33 106 high with a maternal mortality ratio 335 per 100,000 and a neonatal mortality ratio of 20 per  
34  
35 107 1,000 live births, respectively (16).  
36  
37  
38  
39

40 108 The Malagasy health system is organized in 3 tiers of care. While some public emergency  
41  
42 109 referral services exist at the district and national level, they fall short of covering a significant  
43  
44 110 amount of the population, especially in rural areas of the country.  
45  
46  
47

### 48 111 **Intervention**

#### 49 50 51 112 **Setting**

52  
53  
54  
55 113 To improve access to EmOC, the German-Malagasy NGO Doctors for Madagascar  
56  
57 114 established an inter-facility referral system for obstetric and neonatal care in Atsimo-  
58  
59 115 Andrefana (Ampanihy, Betsioky-sud, and Benenitra districts), Androy (Bekily district), and  
60

1  
2  
3 116 Anosy region (Fort-Dauphin district). The intervention covered a catchment population of  
4  
5 117 around 1 million people (17). The intervention was rolled out sequentially, starting in  
6  
7 118 Atsimo-Andrefana and Androy in 2016 and in Anosy in 2018. A 4-wheel drive ambulance  
8  
9 119 was stationed at each of 3 secondary referral hospitals: Hopitaly Zoara Fotadrevo, Hopitaly  
10  
11 120 SALFA Manambaro, and Hopitaly SALFA Ejeda, which served 18, 23, and 13 participating  
12  
13 121 primary health centres, respectively.  
14  
15  
16  
17

18 122 Participating primary health centres (locally known as Centers de Santé de Base (CSB); n =  
19  
20 123 54) could call the ambulance 24h per day without charge. If referral was deemed necessary  
21  
22 124 by a trained medical dispatcher, the ambulance was sent to the CSB to transfer the patient to a  
23  
24 125 higher-level care facility. The referral was free for patients and participating health centres,  
25  
26 126 all costs were covered by the NGO.  
27  
28  
29

### 30 127 Vehicles and equipment

31  
32  
33  
34 128 All ambulances were Toyota 4-wheel drive vehicles, equipped with a stretcher, oxygen,  
35  
36 129 emergency medical equipment, and drugs. Supplementary File 1 summarizes the medical  
37  
38 130 equipment and drugs, which were available on board an ambulance vehicle.  
39  
40  
41

42 131 To improve pre-transport emergency care, the NGO equipped participating CSBs with  
43  
44 132 emergency kits containing alcohol, compresses, cotton swabs, isotonic glucose solution,  
45  
46 133 isotonic saline, intravenous catheters, IV lines, scissors, sterile and non-sterile gloves, and  
47  
48 134 urinary catheters. These kits were checked and refilled by NGO staff after each referral.  
49  
50  
51

### 52 135 Emergency medical teams

53  
54  
55  
56  
57  
58  
59  
60

1  
2  
3 136 All calls from CSBs requesting a referral were processed by a medical emergency dispatcher,  
4  
5 137 usually a medical doctor trained in EmOC and familiar with the local setting. If the dispatcher  
6  
7 138 deemed a referral to be necessary, a vehicle was sent to retrieve the patient from the CSB.  
9

10  
11 139 The medical team aboard each vehicle always consisted of a trained midwife and a driver  
12  
13 140 who had received basic life support training. If necessary, a medical doctor accompanied  
14  
15 141 critical referrals. This decision was made on a case-by-case basis by the dispatcher.  
17  
18

19 142 Performance-based bonus payments

20  
21  
22  
23 143 The referring healthcare worker received a cash bonus of 2.5 USD for each case referred  
24  
25 144 through the intervention, paid at the end of the month.  
26  
27

28 145 Participants

29  
30  
31  
32 146 All women who presented at one of the participating CSBs during the intervention period  
33  
34 147 with an acute complication during pregnancy, childbirth, or postpartum and whose  
35  
36 148 emergency referral was deemed necessary by the medical dispatcher were eligible to  
37  
38 149 participate. Similarly, all neonates born or treated at participating CSBs within the neonatal  
39  
40 150 period of 28 days and whose emergency referral was deemed necessary by the medical  
41  
42 151 dispatcher were eligible to participate.  
43  
44  
45  
46

47 152 All obstetric and neonatal patients using the ambulance referral system between January 5<sup>th</sup>,  
48  
49 153 2016, and September 30<sup>th</sup>, 2020, were included in the descriptive analysis.  
50  
51

52  
53 154 Mothers and neonates presenting at CSBs not participating in the intervention were not  
54  
55 155 eligible for ambulance referral.  
56  
57

58 156 Patients could refuse referral services at any point in time.  
59  
60

1  
2  
3 **157 Data collection and data entry**  
4

5  
6  
7 **158 Medical records**  
8  
9

10 **159** The data source for patient and referral characteristics were case data sheets filled by the  
11  
12 **160** ambulance staff. These data sheets included details on patient characteristics (e.g., gestational  
13  
14 **161** age) and the referral indication.  
15

16  
17  
18 **162** All data were digitized into summary Excel tables by NGO personnel. Healthcare staff, who  
19  
20 **163** were not otherwise involved in this study, replaced patient identifying information with  
21  
22 **164** numerical pseudonyms before forwarding the Excel sheets to the research team for analysis.  
23  
24 **165** Codes linking pseudonyms and identifying information were not accessible to the research  
25  
26 **166** team.  
27

28  
29  
30 **167** We collected the original data in French and translated it into English. Data were cleaned by  
31  
32 **168** 3 independent researchers with regular check-ups to assure consistency in data cleaning. Data  
33  
34 **169** were additionally cross-checked and screened for double entries, out-of-range values, and  
35  
36 **170** overall consistency. In case multiple referral indications were given, an expert panel of 3  
37  
38 **171** Malagasy physicians determined the main referral indication, which were grouped following  
39  
40 **172** the approach by Abegunde et al. (18). All data were stored in a password-protected database  
41  
42 **173** to which only the research team had access.  
43  
44

45  
46  
47  
48 **174 Financial records**  
49

50  
51 **175** The data source for the costs of the intervention were NGO financial records from 2016 to  
52  
53 **176** 2019. A researcher extracted data from the original records and categorized them into  
54  
55 **177** investment and running costs and corresponding sub-categories (medical equipment,  
56  
57  
58  
59  
60

1  
2  
3 178 administration, transport, communication, consumables, pre-transport care, performance-  
4  
5 179 based bonus payments, and training activities).  
6  
7  
8 180 Investment costs were annualized based on lifetime estimates or records of items based on  
9  
10 181 expert estimates from NGO staff active in the study region.  
11  
12  
13 182 We included all costs associated with the initial establishment of the referral systems, e.g.,  
14  
15 183 acquisition of equipment and ambulances, as well as running costs for the 3 project sites in  
16  
17 184 the cost-effectiveness analysis (CEA). Costs for treatments at CSBs and referral hospitals  
18  
19 185 were not included, as those were not supported through the program. Data were collected in  
20  
21 186 Malagasy Ariary or Japanese Yen (1 invoice) and converted to United States dollars for  
22  
23 187 analysis (Exchange rate: 1 USD = 3,867.09 Malagasy Ariary (as of September 22nd, 2020)  
24  
25 188 and 1 USD = 105.671 Japanese Yen (as of September 30th, 2020).  
26  
27  
28  
29  
30 189

## 31 32 33 190 **Data analysis**

### 34 35 36 191 Descriptive statistics

37  
38  
39  
40 192 We performed a descriptive analysis, including frequency distributions, for medical records  
41  
42 193 using Stata Version 16.

### 43 44 45 194 Cost-effectiveness analysis

46  
47  
48  
49 195 We used a cost-effectiveness analysis to quantify the costs per life year saved, as well as the  
50  
51 196 incremental cost-effectiveness ratio of the intervention. As this was not a randomised control  
52  
53 197 trial, we did not develop a health economic analysis plan. We also assessed the sensitivity of  
54  
55 198 the analysis to variation of parameters. We adhere to the CHEERS guideline for economic  
56  
57 199 evaluations of healthcare interventions in structuring this manuscript (19).  
58  
59  
60

1  
2  
3 200 The main outcomes of the model were incremental cost-effectiveness ratios (ICER) per life  
4  
5 201 year saved through the intervention overall, and separately by cohort, where one cohort was  
6  
7 202 defined as all cases referred due to the same referral indication. To calculate the costs for  
8  
9 203 each cohort, we multiplied the average costs per referral with the number of patients per  
10  
11 204 cohort. For each cohort, we calculated the following incremental cost-effectiveness ratio  
12  
13 205 (ICER):  $(\text{Costs of ambulance referral system} - \text{Costs of no referral system}) / ((\text{Life years saved}$   
14  
15 206  $\text{neonates referred} + \text{Life years saved mothers referred}) - (\text{Life years saved neonates not}$   
16  
17 207  $\text{referred} + \text{Life years saved mothers not referred}))$ . To obtain the overall ICER of the  
18  
19 208 intervention, we added the ICERs for individual cohorts, weighted by the frequency of their  
20  
21 209 occurrence.  
22  
23  
24  
25

26 210

## 27 211 Study population and model

28  
29 212 This economic evaluation followed a cost-effectiveness analysis, with a healthcare provider's  
30  
31 213 perspective. For each medical condition that constituted a referral indication, we developed 1  
32  
33 214 decision analytical model (if the condition affected only mother or neonate,  $n = 8$  models) or 2  
34  
35 215 (if the condition affected both mother and neonate,  $n = 9$  models) intervention cohorts, as  
36  
37 216 well as the corresponding number of control cohorts ( $n = 17$  models). The starting age for  
38  
39 217 mothers in the models was 24 years and 0 years for neonates. Individuals from the  
40  
41 218 intervention cohorts were referred to secondary hospitals, while individuals from comparison  
42  
43 219 cohorts were not referred and received only primary care. For all models, a time horizon of  
44  
45 220 100 years was chosen to anticipate lifetime.  
46  
47  
48  
49

50  
51 221 Supplementary files 2 and 3 outline the non-reversible patient journey for referred and non-  
52  
53 222 referred mothers and referred and non-referred neonates, respectively.  
54  
55

56 223

57 224

58  
59  
60

1  
2  
3 225 We applied these exclusion criteria for the CEA: date of referral not during the study period;  
4  
5 226 referral indication unknown or unrelated to emergency obstetric and neonatal care; referral  
6  
7 227 indications with less than 10 cases.  
8  
9

10 228  
11  
12 229 For all cohorts, all-cause mortality was calculated on an annual basis, whereas the first 2  
13  
14 230 stages for the comparison groups and the first 3 stages for the intervention groups were  
15  
16 231 treated as one time stamp.  
17  
18

19 232

20  
21 233 Pathway probabilities

22  
23  
24 234 Medical records were used to determine the number of mothers and neonates treated at  
25  
26 235 participating CSBs for each referral indication.  
27  
28

29 236

30  
31 237 Given that there was no previously published data for this context, survival rates for both  
32  
33 238 referred and non-referred mothers and neonates were estimated through a two-stage expert  
34  
35 239 panel process. 3 Malagasy physicians, otherwise not involved in this study formed the expert  
36  
37 240 panel. They were chosen as a convenience sample, as they were familiar with the NGO's  
38  
39 241 intervention and had long-term experience in maternal health in the intervention area.  
40  
41

42 242

43  
44 243 The research team reviewed existing literature from low- and middle-income countries on  
45  
46 244 maternal survival rates for all referral indications. Both Google Scholar and PubMed were  
47  
48 245 searched to identify relevant studies. From these, we extracted data on survival rates for  
49  
50 246 individual referral indications at primary and secondary facilities as well as information on  
51  
52 247 study design, context, strengths, and limitations. We presented these data to the expert panel.  
53  
54  
55 248 The panel then defined survival rates for each referral indication. Results of this expert panel  
56  
57  
58 249 process are summarized in Table 1 and 2 below. For each condition, the expert panel defined  
59  
60

250 a maximum and minimum survival rate for mothers and neonates at both primary and  
 251 secondary facilities, as well as an average survival rate agreed upon by all experts. This rate  
 252 formed the baseline estimate for our CEA models.

253

254 Table 1: Survival estimates mothers

| Referral indications mothers (n)      | Survival rates when referred to secondary care |     |          | Survival rates when not-referred (primary care only) |     |          | References   |
|---------------------------------------|------------------------------------------------|-----|----------|------------------------------------------------------|-----|----------|--------------|
|                                       | Min                                            | Max | Baseline | Min                                                  | Max | Baseline |              |
| Obstructed labour (251)               | 95%                                            | 99% | 98%      | 80%                                                  | 99% | 90%      | [20; 21; 22] |
| Ineffective labour (137)              | 98%                                            | 99% | 99%      | 85%                                                  | 99% | 95%      | [23; 24; 25] |
| Extrauterine gravidity (50)           | 99%                                            | 95% | 99%      | 1%                                                   | 0%  | 0%       | [26; 27; 28] |
| Post-partum haemorrhage (46)          | 70%                                            | 90% | 80%      | 20%                                                  | 80% | 30%      | [29]         |
| Intrauterine foetal death (IUID) (45) | 90%                                            | 99% | 95%      | 85%                                                  | 95% | 93%      | [30]         |
| Eclampsia                             | 65%                                            | 96% | 75%      | 30%                                                  | 90% | 50%      | [31; 32; 33] |



|                                       |     |     |       |     |     |       |                     |  |
|---------------------------------------|-----|-----|-------|-----|-----|-------|---------------------|--|
| (39)                                  |     |     |       |     |     |       |                     |  |
| Placenta<br>previa (34)               | 85% | 98% | 87%   | 50% | 95% | 70%   | [34; 35; 36;<br>37] |  |
| Abortion (30)                         | 90% | 99% | 95%   | 85% | 95% | 90%   | [38]                |  |
| Risk of<br>premature<br>delivery (26) | 99% | 99% | 99%   | 99% | 98% | 99%   | [29]                |  |
| Placenta<br>retention (25)            | 99% | 99% | 99%   | 50% | 99% | 91%   | [39; 40]            |  |
| Delivery (22)                         | 98% | 99% | 98.5% | 95% | 99% | 96.5% | [29]                |  |
| Infection<br>postpartum<br>(19)       | 90% | 98% | 95%   | 70% | 95% | 80%   | [41; 42]            |  |
| Risk of uterus<br>rupture (17)        | 90% | 95% | 92.5% | 5%  | 40% | 35%   | [43; 44; 45;<br>46] |  |
| Fetal distress<br>(12)                | 98% | 99% | 98.5% | 70% | 99% | 96.5% | [47; 48; 49]        |  |
| Malaria (12)                          | 98% | 99% | 99%   | 95% | 98% | 97.5% | [50]                |  |

255 Table 1. Minimum, maximum, and baseline survival estimates for referred and non-referred  
 256 mothers grouped by referral indication. Survival estimates were obtained by expert panel  
 257 consensus.

258

259 Table 2: Survival estimates neonates

260

| Referral indications neonates (n) | Survival rates when referred to secondary care |     |          | Survival rates when not-referred (primary care only) |     |          | References       |
|-----------------------------------|------------------------------------------------|-----|----------|------------------------------------------------------|-----|----------|------------------|
|                                   | Min                                            | Max | Baseline | Min                                                  | Max | Baseline |                  |
| Obstructed labour (251)           | 60%                                            | 90% | 70%      | 25%                                                  | 80% | 35%      | [20; 21; 22]     |
| Ineffective labour (137)          | 45%                                            | 95% | 55%      | 30%                                                  | 88% | 35%      | [23; 24; 25]     |
| Eclampsia (39)                    | 30%                                            | 80% | 50%      | 15%                                                  | 50% | 25%      | [31; 32; 33]     |
| Placenta previa (34)              | 50%                                            | 95% | 60%      | 20%                                                  | 90% | 30%      | [34; 35; 36; 37] |
| Risk of premature delivery (26)   | 15%                                            | 98% | 70%      | 15%                                                  | 97% | 25%      | [51; 52]         |
| Delivery (22)                     | 85%                                            | 98% | 92%      | 75%                                                  | 95% | 85%      | [29]             |
| Risk of uterus rupture (17)       | 20%                                            | 93% | 90%      | 3%                                                   | 40% | 10%      | [43; 44; 45; 46] |
| Fetal distress (12)               | 70%                                            | 99% | 95%      | 30%                                                  | 98% | 55%      | [47; 48; 49]     |

|                           |     |     |     |     |     |     |          |
|---------------------------|-----|-----|-----|-----|-----|-----|----------|
| Respiratory distress (12) | 5%  | 90% | 20% | 1%  | 50% | 5%  | [53;54]  |
| Malaria (12)              | 90% | 98% | 95% | 90% | 94% | 91% | [43]     |
| Neonatal infection (10)   | 5%  | 85% | 70% | 5%  | 80% | 50% | [51; 55] |

261 Table 2. Minimum, maximum and baseline survival estimates for referred and non-referred  
 262 neonates grouped by referral indication. Survival estimates were obtained by expert panel  
 263 consensus.

264  
 265 Life years

266 Health outcomes were estimated based on local life expectancy tables (56). Costs and life-  
 267 years saved were discounted at a 3% discount rate. This rate reflects the average annual  
 268 growth of the Malagasy economy during the study period<sup>56</sup> and aligns with the approach for  
 269 discounting in economic evaluation suggested by Haacker et al. (58).

270  
 271 Sensitivity analysis

272 Given that no probabilistic data was available in the literature, we performed a one-way  
 273 deterministic sensitivity analysis for the survival rates for referred and non-referred mothers  
 274 and neonates to assess the impact of individual model parameters and assumptions on the  
 275 model outputs.

276

277 **Ethics approval and consent to participate**

1  
2  
3 278 Ethical clearance for the study was obtained from the Heidelberg University Hospital Ethics  
4  
5 279 Committee, registration number: S-713/2020. Informed consent was waived by the ethics  
6  
7  
8 280 committee.  
9  
10  
11  
12  
13  
14  
15  
16  
17  
18  
19  
20  
21  
22  
23  
24  
25  
26  
27  
28  
29  
30  
31  
32  
33  
34  
35  
36  
37  
38  
39  
40  
41  
42  
43  
44  
45  
46  
47  
48  
49  
50  
51  
52  
53  
54  
55  
56  
57  
58  
59  
60

For peer review only

## 281 RESULTS

### 282 Referral characteristics

283 In total, 1,172 patients (48 neonates and 1,124 women, respectively) were referred through  
284 the intervention. Most referrals took place in Atsimo-Andrefana region (54%), followed by  
285 Anosy (45%) and Androy regions (1%). The average distance per referral were 52.8 km.

286

### 287 Demographic and clinical characteristics

288 Mean age of women was 23.6 years (n=1,118; IQR=12). Most neonates (78%, 36/46) were in  
289 their first week of life. 80% of calls were made for direct obstetric causes above all for  
290 obstructed/prolonged labour (40%, 445/1,124) (Table 3). For neonates, the most common  
291 referral indications were respiratory distress (29%, 14/48) or infection (21%, 10/48) (Table  
292 4).

293 Table 3: Referral reasons mothers

| <b>Obstetric complication</b>                                        | <b>Women (n=1,124)</b> | <b>(%)</b> |
|----------------------------------------------------------------------|------------------------|------------|
| Direct causes                                                        | 906                    | 80.6       |
| Abortion and its complications, including intra-uterine foetal death | 89                     | 7.9        |
| Ectopic pregnancy                                                    | 52                     | 4.6        |
| Embolism                                                             | 1                      | 0.1        |
| Hypertensive disorders                                               | 61                     | 5.4        |
| Prepartum/postpartum haemorrhage                                     | 114                    | 10.1       |
| Obstetric trauma                                                     | 18                     | 1.6        |
| Obstructed/prolonged labour                                          | 445                    | 39.6       |
| Other direct causes                                                  | 141                    | 12.5       |
| Indirect causes                                                      | 123                    | 10.9       |
| Anaemia                                                              | 7                      | 0.6        |
| Malaria                                                              | 12                     | 1.1        |
| Tuberculosis                                                         | 1                      | 0.1        |
| Other indirect causes                                                | 88                     | 7.9        |
| Other cases*                                                         | 37                     | 3.3        |
| No obstetric complication specified                                  | 58                     | 5.2        |

\*Such as: no medical staff present at CSB, insufficient equipment for delivery at CSB

1  
2  
3  
4  
5  
6  
7  
8  
9  
10  
11  
12  
13  
14  
15  
16  
17  
18  
19  
20  
21  
22  
23  
24  
25  
26  
27  
28  
29  
30  
31  
32  
33  
34  
35  
36  
37  
38  
39  
40  
41  
42  
43  
44  
45  
46  
47  
48  
49  
50  
51  
52  
53  
54  
55  
56  
57  
58  
59  
60

294 Complications during pregnancy, childbirth, and postpartum, which triggered the referral of  
295 mothers (n =1,124) from participating CSBs to secondary referral hospitals. CSB, Centre de  
296 Santé de Base (public primary care facility).

For peer review only

297 Table 4: Referral reasons neonates

| Complication           | Neonates | %    |
|------------------------|----------|------|
|                        | (n=48)   |      |
| Abdominal bloating     | 3        | 6.3  |
| Birth defect           | 9        | 18.8 |
| Dehydration            | 4        | 8.3  |
| Hypothermia            | 1        | 2.1  |
| Icterus                | 1        | 2.1  |
| Unspecified infection* | 10       | 20.8 |
| Premature birth        | 4        | 8.3  |
| Respiratory distress   | 14       | 29.2 |
| Syphilis               | 1        | 2.1  |
| Other (=vomiting)      | 1        | 2.1  |

\*Unspecified infection included neonates showing signs of infection such as fever, altered cardiorespiratory status or marmorated skin.

298 Complications during the neonatal period, which triggered the referral of neonates (n= 48)

299 from participating CSBs to secondary referral hospitals.

300

301 Not all calls resulted in a completed referral. In 97 cases the ambulance was dispatched but

302 the referral was not completed. Most commonly (65%, 63/97) the complication had been

303 resolved at the CSB either with (25%, 24/97) or without (40%, 39/97) support from the

304 ambulance staff. In 8 cases (8.2%) the woman or neonate had passed away before the

305 ambulance reached the CSB and in 4 cases (4.1%) the patient or patient's relatives refused

306 the referral.



**307 Costs**

308 The total intervention costs over the study period were 394,197 USD.

309 Supplementary File 4 and 5 show the detailed distribution of cost of operating 1 vehicle over  
310 the intervention time frame (January 2016-September 2020).

311 The average cost per referral was 367 USD (n=1075).

312 If the costs of the project were shared among all people living in the project area, initial  
313 investment costs would be 0.13 USD per person and annual running costs 0.06 USD per  
314 person.

315 Around 20% of the population in the study region are women of reproductive age. Assuming  
316 that each of these women could be a potential beneficiary of the project, the costs per  
317 potential beneficiary amount to 0.57 USD per person in investment and 0.26 USD in annual  
318 running costs.

**319 Cost-effectiveness analysis**

320 Incremental life-years saved through the program were 37,882 (rounded to the full year)  
321 undiscounted and 4,872 when discounted at 3%.

322 The overall ICER of the ambulance system was 70 USD per additional life year saved  
323 undiscounted and 137 USD per additional life year saved when discounted at 3%.

324 The ambulance intervention proved particularly cost-effective for cases of extrauterine  
325 gravidity, risk of uterus rupture, and post-partum haemorrhages with ICERs of less than 30  
326 (discounted at 3%). The program proved least effective for cases of malaria in pregnancy and  
327 post-partum infection. Table 5 below lists the costs per life year saved as well as the ICER  
328 per diagnosis.

329 Table 5: Results of CEA

| <b>Referral indication (n)</b>           | <b>Cost per life year saved<br/>discounted/undiscounted<br/>(USD)</b> | <b>ICER discounted/undiscounted</b> |
|------------------------------------------|-----------------------------------------------------------------------|-------------------------------------|
| Obstructed labour (251)                  | 11.2/5.9                                                              | 62.9/30.1                           |
| Ineffective labour (137)                 | 11.7/6.2                                                              | 115.1/54.7                          |
| Extrauterine gravidity<br>(50)           | 14.4/8.0                                                              | 14.4/8.0                            |
| Post-partum<br>haemorrhage (46)          | 17.1/9.5                                                              | 26.4/14.6                           |
| Intrauterine foetal death<br>(IUID) (45) | 15.0/8.3                                                              | 710.9/394.0                         |
| Eclampsia (39)                           | 14.8/7.8                                                              | 40.1/20.7                           |
| Placenta previa (34)                     | 12.3/6.5                                                              | 57.8/28.3                           |
| Abortion (30)                            | 15.0/8.3                                                              | 284.3/157.6                         |
| Risk of premature<br>delivery (26)       | 11.0/5.8                                                              | 72.9/32.7                           |

|                                      |            |             |
|--------------------------------------|------------|-------------|
| Placenta retention (25)              | 14.3/7.9   | 171.3/94.9  |
| Delivery (22)                        | 10.4/5.4   | 288.5/138.9 |
| Infection postpartum<br>(19)         | 59.9/33.2  | 379.1/210.1 |
| Risk of uterus rupture<br>(17)       | 10.9/5.7   | 15.6/8.0    |
| Fetal distress (12)                  | 10.3/5.3   | 76./34.5    |
| Malaria (12)                         | 10.3/5.3   | 447.8/217.8 |
| Respiratory distress<br>neonate (12) | 170.2/75.8 | 227.0/101.0 |
| Neonatal infection (10)              | 48.6/21.7  | 107.2/75.6  |

330 Table 5: Costs per life-year saved (in USD) and ICER per diagnosis, undiscounted and  
331 discounted at 3%.

332 Sensitivity analysis

333 The sensitivity analysis showed the intervention to remain cost-effective for most scenarios  
334 tested. However in the following cases either the survival rate estimates at the participating  
335 CSB exceeded the baseline estimate at the referral hospital or the worst case estimate at the  
336 hospital was lower than the baseline estimate at the CSB, rendering the scenario not cost  
337 effective: Mothers survival for eclampsia, neonates survival for ineffective labour, neonate

1  
2  
3 338 survival for neonatal infection, neonates survival for respiratory distress and neonates  
4

5 339 survival for risk of premature delivery tested.  
6  
7

8 340  
9  
10  
11  
12  
13  
14  
15  
16  
17  
18  
19  
20  
21  
22  
23  
24  
25  
26  
27  
28  
29  
30  
31  
32  
33  
34  
35  
36  
37  
38  
39  
40  
41  
42  
43  
44  
45  
46  
47  
48  
49  
50  
51  
52  
53  
54  
55  
56  
57  
58  
59  
60

For peer review only

1  
2  
3 **341 DISCUSSION**  
4  
5

6 **342** The aim of this study was to evaluate the characteristics, costs, and cost-effectiveness of an  
7  
8 **343** NGO-run inter-facility referral system for EmOC in rural Madagascar.  
9

10  
11  
12 **344** This study revealed three main findings: First, the most common referral indication for  
13  
14 **345** mothers was obstructed/prolonged labour and unspecified infection or respiratory distress for  
15  
16 **346** neonates. Second, the largest drivers of costs for the intervention were initial investment costs  
17  
18 **347** for the vehicles and running costs including staff wages. Consequently, ambulance lifespan is  
19  
20 **348** a particularly important determinant of the intervention's cost-effectiveness. Lastly, the CEA  
21  
22 **349** demonstrated the intervention to be very cost-effective, with an ICER of 137 USD per  
23  
24 **350** additional life year saved (discounted at 3%). The intervention was particularly cost-effective  
25  
26 **351** for the following conditions: extrauterine gravidity, risk of uterus rupture, and post-partum  
27  
28 **352** haemorrhage. The sensitivity analysis conducted showed the intervention to remain cost-  
29  
30 **353** effective in most scenarios tested.  
31  
32  
33  
34  
35

36 **354** In accordance with our findings, other systems for EmOC referral in SSA have found direct  
37  
38 **355** obstetric complications, especially abortion and obstructed labour to be the main referral  
39  
40 **356** indications for mothers to secondary health facilities in resource-constrained settings (11, 59).  
41  
42  
43

44 **357** Compared with other ambulance referral systems in Uganda (9), Burundi (11) and Ethiopia  
45  
46 **358** (12), costs for our intervention were high. This finding is however not surprising considering  
47  
48 **359** that referrals in other interventions were not accompanied by trained medical personnel  
49  
50 **360** receiving salaries. Neither ambulance carried medical equipment and neither publication  
51  
52 **361** included overhead costs such as administrative costs in their cost-effectiveness analysis. In  
53  
54 **362** addition, our intervention covered a large rural area in the remote south of Madagascar; there  
55  
56 **363** were no paved roads and conditions deteriorated during the rainy season when parts of the  
57  
58 **364** intervention became inaccessible. This increased costs for vehicle maintenance and fuel.  
59  
60

1  
2  
3 365 These differences in the design of the interventions as well as their contexts of  
4  
5 366 implementation likely explain the higher ICER of 137 USD per additional life year saved  
6  
7 367 (discounted) when compared to ICERs of 16 USD (9) and 25 USD per additional life year  
8  
9 368 saved (12) in Uganda and Ethiopia, respectively. Further, these studies only included referrals  
10  
11 369 in their analysis which were deemed “undoubtedly effective” (9,12), i.e., cases in which the  
12  
13 370 referral was likely to have a large impact on life-years saved. Our model on the other hand  
14  
15 371 included all cases in the calculation of the overall ICER.

16  
17  
18  
19  
20 372 Consequently, costs per referral were higher for our setting than in other studies. Tayler-  
21  
22 373 Smith et al. reported costs of 61 USD per referral, with 1,478 ambulance referrals per year  
23  
24 374 (11), compared to 1,075 completed referrals over 4 years, with an average cost per referral of  
25  
26 375 367 USD in our setting.

27  
28  
29  
30 376 Regarding the per capita costs, our intervention compares preferably, with investment costs  
31  
32 377 of 0.13 USD per person and annual running costs 0.06 USD per person, when extrapolated to  
33  
34 378 the entire population serviced. This is much lower than what has been reported in other rural  
35  
36 379 settings, for example in Burundi (€ 0.43/capita/year) (11), suggesting that the intervention  
37  
38 380 described here served a much larger population at comparable costs and suggesting that the  
39  
40 381 intervention could be sustainable, even in a setting where most of the population lives in  
41  
42 382 extreme poverty (60).

43  
44  
45  
46  
47 383 Our study has three main strengths: First, we used secondary NGO data as the basis for all  
48  
49 384 analyses. This reduced the potential for erroneous data as there was no need to rely on  
50  
51 385 estimations. Further, our data provide insights into a particularly vulnerable and resource-  
52  
53 386 constrained setting for which data is otherwise hard to obtain. Second, we included all costs  
54  
55 387 for the running of the ambulance system in the cost-effectiveness analysis, including  
56  
57 388 overhead costs such as administrative costs, rendering more realistic cost estimates than other  
58  
59  
60

1  
2  
3 389 studies. Third, we obtained survival estimates using a multi-step expert consensus process,  
4  
5 390 when these data were not available from the literature.  
6  
7

8 391 Our study has several limitations. First, we were constrained by the availability of  
9  
10 392 programmatic data and had to rely on expert opinions to estimate equipment lifespans as well  
11  
12 393 as survival rates for the economic model. For the latter, to mitigate potential bias we  
13  
14 394 established an expert panel consensus process to estimate survival rates. Second, data were  
15  
16 395 not available on mothers' post-delivery complications or their previous patient history to  
17  
18 396 allow for more nuanced calculations for life years saved and our model only accounted for  
19  
20 397 mothers and neonates, for whom referral was successful. However, we do not expect either  
21  
22 398 factor to have a large impact on the model's cost-effectiveness and are confident that the  
23  
24 399 approach of constructing separate models per cohort can robustly identify the most cost-  
25  
26 400 effective applications of inter-facility EmOC referrals. Last, we did not assess whether the  
27  
28 401 intervention met the referral needs of the population in the study area.  
29  
30  
31  
32  
33

## 34 402 **CONCLUSION**

35  
36  
37  
38 403 Our study is the first to report the cost-effectiveness of an EmOC inter-facility referral system  
39  
40 404 in Madagascar. We find the intervention to have been very cost-effective, especially for cases  
41  
42 405 requiring surgical care. Our findings highlight the need for a comprehensive approach to  
43  
44 406 providing rural EmOC services and may provide guidance on public health resource  
45  
46 407 allocation in Madagascar.  
47  
48  
49

50 408  
51  
52  
53  
54  
55  
56  
57  
58  
59  
60

1  
2  
3 **409 AUTHOR CONTRIBUTIONS**  
4

5 410 MAF, AF, KN, NM, SK, and JVE developed the study design in collaboration with TB.  
6

7 411 MAF, AF, RMR, MR, ZR and KN were responsible for data collection and study  
8

9 412 administration. MAF, AF, KN, NM, RMR, ZR, SK, and JVE contributed to the analysis.  
10

11 413 MAF, AF, and KN prepared the first draft of the manuscript. All authors contributed to  
12

13 414 writing the manuscript. All authors read and approved the final manuscript.  
14

15 415  
16

17  
18  
19 **416 ACKNOWLEDGEMENTS**  
20

21 417 We thank all midwives and ambulance drivers from Ejeda, Fotadrevo and Manambaro for  
22

23 418 collecting the data that support the findings of this study.  
24

25 419  
26

27  
28 **420 PATIENT AND PUBLIC INVOLVEMENT STATEMENT**  
29

30 421 This study did not involve patients in the research process. However, we did involve three  
31

32 422 independent Malagasy clinicians in the research process as key informants for the expert  
33

34 423 panel process to define survival probabilities for the different patient pathways. This greatly  
35

36 424 enhanced the applicability and relevance of our research for the context of Southern  
37

38 425 Madagascar.  
39  
40  
41  
42  
43  
44  
45  
46  
47  
48  
49  
50  
51  
52  
53  
54  
55  
56  
57  
58  
59  
60



426 **REFERENCES**

- 427 [1] World Health Organization: Maternal mortality: Levels and trends 200 to 2017.  
428 <https://www.who.int/publications/i/item/9789241516488>. 2019. Accessed: 10.03.2021.
- 429 [2] Say L, Chou D, Gemmill A, et al.. Global causes of maternal death: a WHO systematic  
430 analysis. *Lancet Glob Health*. 2014; doi:10.1016/S2214-109X(14)70227-X.
- 431 [3] Liu L, Oza S, Hogan D, et al. Global, regional, and national causes of child mortality in  
432 2000–13, with projections to inform post-2015 priorities: an updated systematic analysis.  
433 *Lancet*. 2015; doi://doi.org/10.1016/S0140-6736(14)61698-6.
- 434 [4] Thaddeus S and Maine D. Too far to walk: Maternal mortality in context. *Soc Sci Med*.  
435 1994; doi:[https://doi.org/10.1016/0277-9536\(94\)90226-7](https://doi.org/10.1016/0277-9536(94)90226-7).
- 436 [5] Kyei-Nimakoh M, Carolan-Olah M, McCann, TV. Access barriers to obstetric care at  
437 health facilities in sub-Saharan Africa—a systematic review. *Syst Rev*. 2017;  
438 doi:<https://doi.org/10.1186/s13643-017-0503-x>.
- 439 [6] Schmitz MM, Serbanescu F, Arnott GE, et al. Referral transit time between sending and  
440 first-line receiving health facilities: a geographical analysis in Tanzania. *BMJ Glob Health*.  
441 2019; doi: 8. doi:10.1136/ bmjgh-2019-001568.
- 442 [7] Mgawadere F, Unkels R, Kazembe A, et al. Factors associated with maternal mortality in  
443 Malawi: application of the three delays model. *BMC Pregnancy Childbirth*. 2017;  
444 doi:10.1186/s12884-017-1406-5.
- 445 [8] Wilmot E, Yotebieng M, Norris A. et al. Missed Opportunities in Neonatal Deaths in  
446 Rwanda: Applying the Three Delays Model in a Cross-Sectional Analysis of Neonatal Death.  
447 *Matern Child Health*. 2017; doi:<https://doi.org/10.1007/s10995-016-2210-y>.

- 1  
2  
3 448 [9] Somigliana E, Sabino A, Nkurunziza R, et al. Ambulance service within a comprehensive  
4  
5 449 intervention for reproductive health in remote settings: a cost-effective intervention. Trop  
6  
7 450 Med Int Health. 2011; doi:<https://doi.org/10.1111/j.1365-3156.2011.02819.x>  
8  
9  
10  
11 451 [10] de Ramirez SS, Doll J, Carle S, et al. Emergency response in resource-poor settings: a  
12  
13 452 review of a newly-implemented EMS system in rural Uganda. Prehosp Disaster Med. 2014;  
14  
15 453 doi:10.1017/S1049023X14000363.  
16  
17  
18  
19 454 [11] Tayler-Smith K, Zachariah R, Manzi M, et al. An ambulance referral network improves  
20  
21 455 access to emergency obstetric and neonatal care in a district of rural Burundi with high  
22  
23 456 maternal mortality. Trop Med Int Health. 2013; doi:<https://doi.org/10.1111/tmi.12121>  
24  
25  
26  
27 457 [12] Accorsi S, Somigliana E, Solomon H. et al. Cost-effectiveness of an ambulance-based  
28  
29 458 referral system for emergency obstetrical and neonatal care in rural Ethiopia. BMC  
30  
31 459 Pregnancy Childbirth. 2017; doi:<https://doi.org/10.1186/s12884-017-1403-8>  
32  
33  
34  
35 460 [13] UNECA: Healthcare and Economic Growth in Africa. UNECA. 2019.  
36  
37 461 <https://repository.uneca.org/handle/10855/43118> Accessed 14 Jun 2021.  
38  
39  
40  
41 462 [14] Dingle A, Schäferhoff M, Borghi J, et al. Estimates of aid for reproductive, maternal,  
42  
43 463 newborn, and child health: findings from application of the Muskoka2 method. Lancet Glob  
44  
45 464 Health. 2020; doi: [10.1016/S2214-109X\(20\)30005-X](https://doi.org/10.1016/S2214-109X(20)30005-X).  
46  
47  
48  
49 465 [15] The World Bank: The face of poverty in Madagascar.  
50  
51 466 <http://documents1.worldbank.org/curated/en/538821468271809604/pdf/781310PRIORITY0>  
52  
53 467 [English0Apr900May012.pdf](http://documents1.worldbank.org/curated/en/538821468271809604/pdf/781310PRIORITY0English0Apr900May012.pdf) (2014). Accessed 28 Nov 2020.  
54  
55  
56  
57 468 [16] The World Bank Data Bank. The World Bank. 2019.  
58  
59 469 <https://data.worldbank.org/indicator/SH.DYN.NMRT?locations=MG>. Accessed 28 Aug 2020.  
60

- 1  
2  
3 470 [17] Sectorisation. Malagasy Ministry of health. 2020. [unpublished data set] Accessed 29  
4  
5 471 Aug 2020.  
6  
7  
8  
9 472 [18] Abegunde D, Kabo IA, Sambisa W, et al.. Availability, utilization, and quality of  
10  
11 473 emergency obstetric care services in Bauchi State, Nigeria. *Int J Gynaecol Obstet*.  
12  
13 474 2015;128:251–55.  
14  
15  
16 475 [19] Husereau D, Drummond M, Petrou S, et al. Consolidated Health Economic Evaluation  
17  
18 476 Reporting Standards (CHEERS) statement *BMJ* 2013; 346 :f1049 doi:10.1136/bmj.f1049  
19  
20  
21  
22 477 [20] Omole-Ohonsi and Ashimi. Obstructed Labour – A Six Year Review in Aminu Kano  
23  
24 478 Teaching Hospital, Kano, Nigeria. *Nigerian Medical Practitioner*. 2007;  
25  
26 479 doi:10.4314/nmp.v51i4.28843.  
27  
28  
29  
30 480 [21] Kabakyenga JK, Östergren PO, Turyakira E. et al. Individual and health facility factors  
31  
32 481 and the risk for obstructed labour and its adverse outcomes in south-western Uganda. *BMC*  
33  
34 482 *Pregnancy Childbirth*. 2011; doi:<https://doi.org/10.1186/1471-2393-11-73>  
35  
36  
37  
38 483 [22] Gessesew and Mesfin. Obstructed Labour in Adigrat Zonal Hospital, Tigray Region,  
39  
40 484 Ethiopia. *Ethiop J Health Dev*. 2003;17:3.  
41  
42  
43  
44 485 [23] Ekanem EI, Umoiyoho A, and Inyang-Out A. Study of Electrolyte Changes in Patients  
45  
46 486 with Prolonged Labour in Ikot Ekpene, a Rural Community in Niger Delta Region of Nigeria.  
47  
48 487 *Int Sch Res Notices*. 2012; doi: <https://doi.org/10.5402/2012/430265>  
49  
50  
51  
52 488 [24] Thonneau PF, Matsudai T, Alihonou E, et al. Distribution of causes of maternal  
53  
54 489 mortality during delivery and post-partum: results of an African multicentre hospital-based  
55  
56 490 study. *Eur J Obstet Gynecol Reprod Bio*. 2004;  
57  
58 491 doi:<https://doi.org/10.1016/j.ejogrb.2003.12.004>.  
59  
60

- 1  
2  
3 492 [25] Ajenifuja KO, Adepiti CA, Ogunniyi SO. Post partum haemorrhage in a teaching  
4  
5 493 hospital in Nigeria: a 5-year experience. *Afr Health Sci.* 2010;10:1.  
6  
7  
8  
9 494 [26] Etuknwa BT, Azu OO, Peter AI, et al. Ectopic pregnancy: A Nigerian urban experience.  
10  
11 495 *Korean Journal of Obstetrics & Gynecology.* 2021;  
12  
13 496 doi:<https://doi.org/10.5468/KJOG.2012.55.5>.  
14  
15  
16  
17 497 [27] Fouedjio JH, Fouelifack YF, Fouogue TJ, et al. Clinical features of extra-uterine  
18  
19 498 pregnancy in Cameroon: a review of 148 cases at the Yaounde Central Hospital. *Facts Views*  
20  
21 499 *Vis Obgyn.* 2018;10(3):165-168.  
22  
23  
24  
25 500 [28] Dattijo LM, El-Nafaty AU, Aminu BM, et al. Ectopic Pregnancy in Bauchi, North-East  
26  
27 501 Nigeria. *Trop J Obstet Gynaecol.* 2014;31:1.  
28  
29  
30  
31 502 [29] Besaina R, Randriamahavonjy R, Laingo R, et al. Maternal mortality related to  
32  
33 503 postpartum hemorrhage: a case-control study at the Befelatanana maternity of Madagascar.  
34  
35 504 *Int J Reprod Contracept Obstet Gynecol.* 2018; doi:10.18203/2320-1770.ijrcog20185406.  
36  
37  
38  
39 505 [30] Bailey PE, Andualet W, Brun M. et al. Institutional maternal and perinatal deaths: a  
40  
41 506 review of 40 low and middle income countries. *BMC Pregnancy Childbirth.* 2017;  
42  
43 507 doi:<https://doi.org/10.1186/s12884-017-1479-1>.  
44  
45  
46  
47 508 [31] Yakasai and Gaya. Maternal and fetal outcome in patients with eclampsia at Murtala  
48  
49 509 Muhammad specialist Hospital Kano, Nigeria. *Ann Afr Med.* 2011; doi:10.4103/1596-  
50  
51 510 3519.87049.  
52  
53  
54  
55 511 [32] Ratsiatosika AT, Razafimanantsoa E, Andriantoky VB, et al. Incidence and natural  
56  
57 512 history of preeclampsia/eclampsia at the university maternity of Antananarivo, Madagascar:  
58  
59  
60

- 1  
2  
3 513 high prevalence of the early-onset condition. *J Matern Fetal Neonatal Med.* 2019;  
4  
5 514 doi:10.1080/14767058.2018.1462323.  
6  
7  
8  
9 515 [33] Adekanle and Akinbile. Eclampsia and Pregnancy Outcome at Lautech Teaching  
10  
11 516 Hospital, Osogbo, SouthWest, Nigeria. *Clin Mother Child Health.* 2021;  
12  
13 517 doi:10.4303/cmch/C120301.  
14  
15  
16  
17 518 [34] Berhan. Predictors of Perinatal Mortality Associated with Placenta Previa and Placental  
18  
19 519 Abruptio: An Experience from a Low Income Country. *J Pregnancy.* 2014;  
20  
21 520 doi:https://doi.org/10.1155/2014/307043.  
22  
23  
24  
25 521 [35] Anzaku and Musa. Placenta Praevia: Incidence, Risk Factors, Maternal and Fetal  
26  
27 522 Outcomes in a Nigerian Teaching Hospital. *Jos J Med.* 2012;6:1.  
28  
29  
30 523 [36] Burodo and Shehu. Placenta praevia at Usmanu Danfodiyo University Teaching  
31  
32 524 Hospital, Sokoto: A 5-year review. *Sahel Med J.* 2013;16:2:56-9.  
33  
34  
35  
36 525 [37] Kongnyuy EJ, Kouam L, Ngassa P et al.. Placenta praevia: epidemiology and  
37  
38 526 management at the University Teaching Hospital (CHU) Yaounde. *Clin Mother Child Health.*  
39  
40 527 2004;1:2.  
41  
42  
43  
44 528 [38] Goyaux N, Alihonou E, Diadhiou F, et al. Complications of induced abortion and  
45  
46 529 miscarriage in three African countries: a hospital-based study among WHO collaborating  
47  
48 530 centers. *Acta Obstet Gynecol Scand.* 2001;80(6):568-73.  
49  
50  
51  
52 531 [39] Beltman J, van den Akker T, Van Lonkhuijzen L, et al. Beyond maternal mortality:  
53  
54 532 obstetric hemorrhage in a Malawian district. *Acta Obstet Gynecol Scand.* 2011;  
55  
56 533 doi:https://doi.org/10.1111/j.1600-0412.2011.01219.  
57  
58  
59  
60

- 1  
2  
3 534 [40] Owolabi AT, Dare FO, Fasubaa OB, et al. Risk factors for retained placenta in  
4  
5 535 southwestern Nigeria. *Singapore Med J.* 2008;49:532-7.  
6  
7  
8  
9 536 [41] Ngonzi J, Bebell LM, Fajardo Y., et al. Incidence of postpartum infection, outcomes,  
10  
11 537 and associated risk factors at Mbarara regional referral hospital in Uganda. *BMC Pregnancy*  
12  
13 538 *Childbirth.* 2018; doi:<https://doi.org/10.1186/s12884-018-1891-1>  
14  
15  
16  
17 539 [42] Rwabizi D, Rulisa S, Aidan F. et al. Maternal near miss and mortality due to postpartum  
18  
19 540 infection: a cross-sectional analysis from Rwanda. *BMC Pregnancy Childbirth.* 2016;  
20  
21 541 doi:<https://doi.org/10.1186/s12884-016-0951-7>.  
22  
23  
24  
25 542 [43] Kidanto HL, Mwampagatwa I, Van Roosemalen J. Uterine rupture: a retrospective  
26  
27 543 analysis of causes, complications and management outcomes at Muhimbili National Hospital  
28  
29 544 in Dar es Salaam, Tanzania. *Tanzan J Health Res.* 2012 doi:10.4314/thrb.v14i3.9.  
30  
31  
32  
33 545 [44] Kadowa. Ruptured uterus in rural Uganda: prevalence, predisposing factors, and  
34  
35 546 outcomes. *Singapore Med J.* 2010;51:1: 35.  
36  
37  
38  
39 547 [45] Strand RT, Tumba P, Niekowal J, et al. Audit of cases with uterine rupture: A process  
40  
41 548 indicator of quality of obstetric care in Angola. *Afr J Reprod Health.* 2010;14:2.  
42  
43  
44  
45 549 [46] Ahmed DM, Mengistu TS, Endalamaw AG. Incidence and factors associated with  
46  
47 550 outcomes of uterine rupture among women delivered at Felegehiwot referral hospital, Bahir  
48  
49 551 Dar, Ethiopia: cross sectional study. *BMC Pregnancy Childbirth.* 2018;  
50  
51 552 doi:<https://doi.org/10.1186/s12884-018-2083-8>.  
52  
53  
54  
55 553 [47] Adanikin and Awoleke. Clinical suspicion, management, and outcome of intrapartum  
56  
57 554 foetal distress in a public hospital with limited advanced foetal surveillance. *J Matern Fetal*  
58  
59 555 *Neonatal Med.* 2017; doi:<https://doi.org/10.1080/14767058.2016.117499>.  
60

- 1  
2  
3 556 [48] Rotich SK, Ndavi MP, Rukaria-Kaumbutho R, et al. Early perinatal outcome in cases  
4  
5 557 delivered through caesarian section following clinical diagnosis of severe foetal distress at  
6  
7 558 Kenyatta National Hospital. *East Afr Med J.* 2006;83:5.
- 9  
10  
11 559 [49] Oladapo OT, Sotimehin SA, Ayoola-Sotubo O. Predictors of Severe Neonatal  
12  
13 560 Compromise Following Caesarean Section for Clinically Diagnosed Foetal Distress. *West*  
14  
15 561 *Afr J Med.* 2009; doi:10.4314/wajm.v28i5.55014.
- 17  
18  
19 562 [50] Menéndez C, Bardaji A, Sigauque B et al.. Malaria Prevention with IPTp during  
20  
21 563 Pregnancy Reduces Neonatal Mortality. *PlosOne.* 2010; doi:10.1371/journal.pone.0009438.
- 23  
24  
25 564 [51] Hoque M, S Haaq S, Islam R. Causes of neonatal admissions and deaths at a rural  
26  
27 565 hospital in KwaZulu-Natal, South Africa. *South Afr J Epidemiol Infect.* 2011;  
28  
29 566 doi:10.1080/10158782.2011.11441416.
- 31  
32  
33 567 [52] Mahande MJ, Daltveit AK, Obure J, et al. Recurrence of preterm birth and perinatal  
34  
35 568 mortality in northern Tanzania: registry-based cohort study. 2013;  
36  
37 569 doi:https://doi.org/10.1111/tmi.12111.
- 39  
40  
41 570 [53] Tochie JN, Choukem SP, Langmia, RN, et al. Neonatal respiratory distress in a reference  
42  
43 571 neonatal unit in Cameroon: an analysis of prevalence, predictors, etiologies, and outcomes.  
44  
45 572 *Pan Afr Med J.* 2016;24:1.
- 47  
48  
49 573 [54] Andegiorgish AK, Andemariam M, Temesghen S. et al. Neonatal mortality and  
50  
51 574 associated factors in the specialized neonatal care unit Asmara, Eritrea. *BMC Public Health.*  
52  
53 575 2020; doi:https://doi.org/10.1186/s12889-019-8118-x.
- 54  
55  
56  
57  
58  
59  
60

- 1  
2  
3 576 [55] Gezmu AM, Bulabula ANH, Dramowski A et al.. Laboratory-confirmed bloodstream  
4  
5 577 infections in two large neonatal units in sub-Saharan Africa. *Int J Infect Dis.* 2021;  
6  
7 578 doi:<https://doi.org/10.1016/j.ijid.2020.11.169>.  
9  
10  
11 579 [56] Life tables by country. World Health Organization, Geneva. 2020.  
12  
13 580 <https://apps.who.int/gho/data/view.main.60970?lang=en>. Accessed 30 Apr 2021.  
14  
15  
16 581 [57] Tableau du Bord économique N 42°. Institut National de la Statistique, Antananarivo.  
17  
18 582 2021. [https://www.instat.mg/documents/upload/main/INSTAT\\_TBE42\\_01-](https://www.instat.mg/documents/upload/main/INSTAT_TBE42_01-)  
19  
20 583 [2021.pdf](https://www.instat.mg/documents/upload/main/INSTAT_TBE42_01-2021.pdf). Accessed 24 May 2021.  
21  
22  
23  
24 584 [58] Haacker M, Hallett TB, Atun R. On discount rates for economic evaluations in global  
25  
26 585 health. *Health Policy Plan.* 2020; doi:<https://doi.org/10.1093/heapol/czz127>.  
27  
28  
29  
30 586 [59] Tsegaye A, Somigliana E, Alemayehu T, Calia F, Maroli M, Barban P, Manenti F, Putoto  
31  
32 587 G, Accorsi S. Ambulance referral for emergency obstetric care in remote settings. *Int J*  
33  
34 588 *Gynaecol Obstet.* 2016;113:316-9.  
35  
36  
37  
38 589 [60] Poverty headcount ratio at (2011 PPP) (% of population). The World Bank Group,  
39  
40 590 Washington DC.  
41  
42 591 [https://data.worldbank.org/indicator/SI.POV.DDAY?end=2017&locations=1W&name\\_desc=](https://data.worldbank.org/indicator/SI.POV.DDAY?end=2017&locations=1W&name_desc=true&start=1981&view=chart)  
43  
44 592 [true&start=1981&view=chart](https://data.worldbank.org/indicator/SI.POV.DDAY?end=2017&locations=1W&name_desc=true&start=1981&view=chart). Accessed 11 Mar 2021.  
45  
46  
47  
48 593  
49  
50  
51  
52 594  
53  
54  
55 595  
56  
57  
58  
59  
60



1  
2  
3 **596 SUPPLEMENTARY FILE LEGENDS**  
4  
5

6 **597** Supplementary file 2. Non-reversible patient journey for referred and non-referred mothers.

8  
9 **598** For referred mothers, the model included 4 stages: 1) presentation at a participating CSB

10  
11 **599** because of an emergency during pregnancy or childbirth, 2) referral to secondary referral

12  
13 **600** hospital, 3) likelihood of survival at referral hospital, 4) all-cause mortality. The model

14  
15 **601** included 3 stages for non-referred mothers: 1) presentation at a CSB because of an

16  
17 **602** emergency during pregnancy or childbirth, 2) likelihood of survival at CSB, 3) all-cause

18  
19 **603** mortality. CSB, Centre de Santé de Base (public primary care facility).  
20  
21  
22

23 **604**

24  
25 **605** Supplementary file 3. Non-reversible patient journey for referred and non-referred neonates.

26  
27 **606** For referred neonates the model included 4 stages: 1) presentation at a CSB because of an

28  
29 **607** emergency peripartum or in the neonatal period, 2) referral to secondary referral hospital, 3)

30  
31 **608** likelihood of survival at referral hospital, 4) all-cause mortality. For non-referred neonates,

32  
33 **609** the model included 3 stages: 1) presentation at a CSB because of an emergency peripartum or

34  
35 **610** in the neonatal period, 2) likelihood of survival at CSB, 3) all-cause mortality. CSB, Centre

36  
37 **611** de Santé de Base (public primary care facility).  
38  
39  
40  
41  
42  
43  
44  
45  
46  
47  
48  
49  
50  
51  
52  
53  
54  
55  
56  
57  
58  
59  
60

1  
2 Supplementary File 1: Ambulance furnishings  
3  
4

5 **Medical equipment**

6 **Drugs**

- 
- 7  
8  
9
- |                                 |                                |
|---------------------------------|--------------------------------|
| 10 ● Alcohol                    | 10 ● Analgesics                |
| 11 ● Betadine                   | 11 ○ Paracetamol               |
| 12 ● Blood sugar testing strips | 12 ● Antibiotics               |
| 13 ● Cord clamps                | 13 ○ Ampicillin                |
| 14 ● Echography gel             | 14 ○ Amoxicillin               |
| 15 ● Intravenous catheters      | 15 ● Antihypertensive agents   |
| 16 ● Non-sterile compresses     | 16 ○ Magnesium Sulphate        |
| 17 ● Non-sterile gloves         | 17 ○ Nicardipine               |
| 18 ● IV lines                   | 18 ● Infusion solutions        |
| 19 ● Plasters                   | 19 ○ Isotonic Glucose solution |
| 20 ● Pregnancy test             | 20 ○ Isotonic saline           |
| 21 ● Sterile compresses         | 21 ○ Lactated Ringer's         |
| 22 ● Sterile gloves             | 22 ○ Sodium Chloride           |
| 23 ● Ultrasound machine         | 23 ● Uterotonic agents         |
| 24 ● Urinary catheters and bags | 24 ○ Misoprostol               |
|                                 | 25 ○ Oxytocin                  |
|                                 | 26 ● Other                     |
|                                 | 27 ○ Calcium gluconate         |
|                                 | 28 ○ Diazepam                  |
|                                 | 29 ○ Paracetamol               |
|                                 | 30 ○ Salbutamol                |
|                                 | 31 ○ Tranexamic acid           |
|                                 | 32 ○ Vitamin K                 |
- 

33  
34  
35  
36  
37  
38  
39  
40  
41  
42  
43  
44  
45  
46  
47  
48  
49  
50  
51  
52 Medical equipment and drugs available aboard ambulance vehicles.  
53  
54  
55  
56  
57  
58  
59  
60

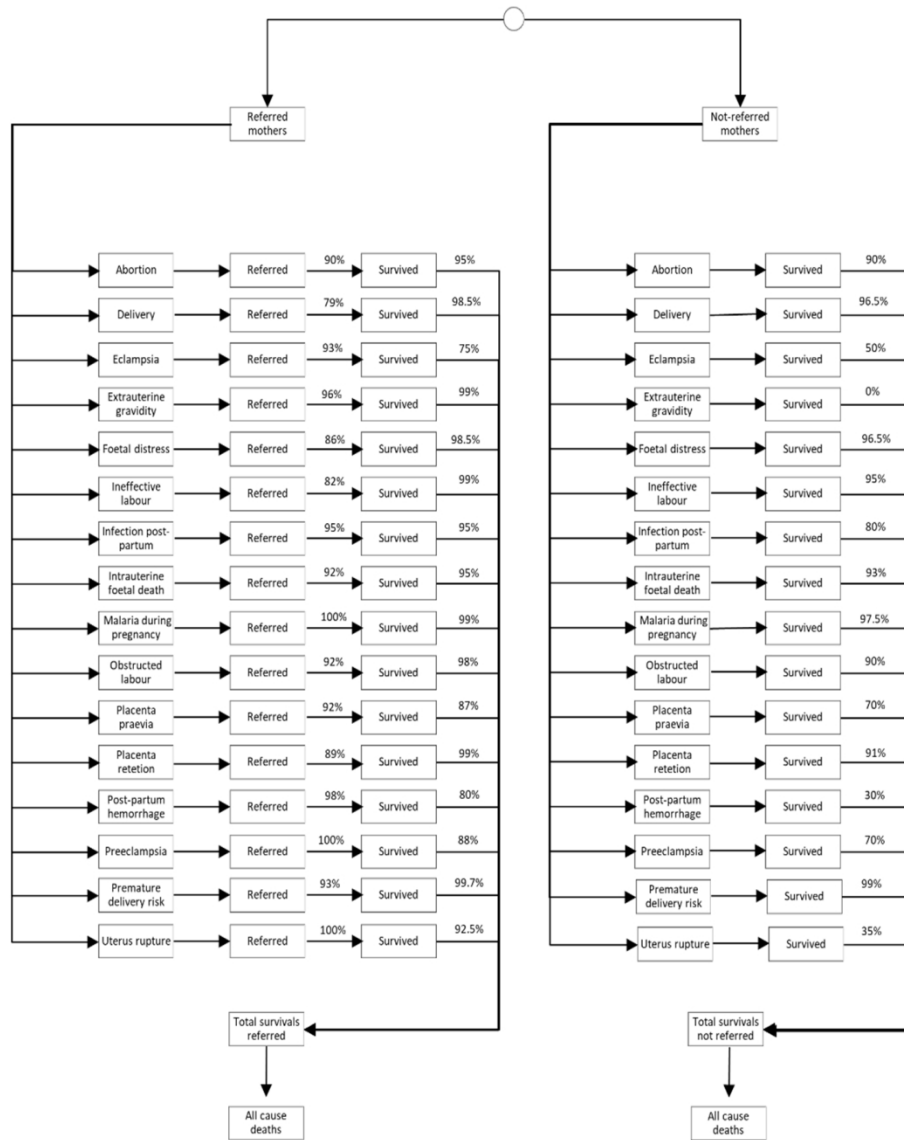

453x560mm (87 x 87 DPI)

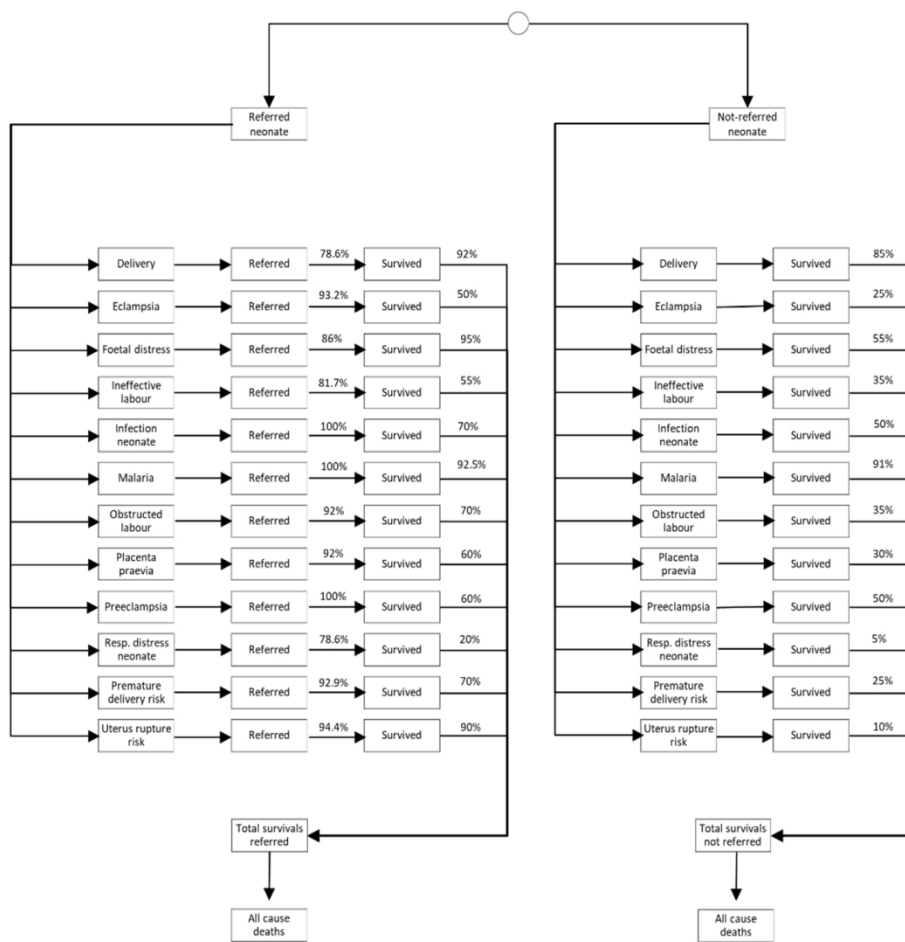

464x468mm (87 x 87 DPI)

1  
2 Supplementary File 2: Investment costs  
3  
4

5  
6 **Item** **Cost per unit (USD)** **Quantity**  
7  
8

---

9  
10 **Ambulance**  
11  
12

---

13  
14  
15 Port charges, forwarding agent 3,620 1  
16  
17  
18  
19 Shipment from Japan to Madagascar including insurance 3,020\* 1  
20  
21  
22  
23  
24  
25 Vehicle 38,254 1  
26  
27

---

28  
29 Subtotal 45,487  
30  
31

---

32  
33 **Equipment ambulance**  
34  
35

---

36  
37  
38 Carpet 38 1  
39  
40  
41  
42  
43 Fire extinguisher 26 1  
44  
45  
46  
47  
48 Luggage rack 282 1  
49  
50  
51  
52  
53  
54  
55  
56  
57  
58  
59  
60

---

| Item                     | Cost per unit (USD) | Quantity |
|--------------------------|---------------------|----------|
| Steering wheel cover     | 74                  | 1        |
| Tarpaulin                | 74                  | 1        |
| <u>Subtotal</u>          | 593                 |          |
| <b>Administration</b>    |                     |          |
| IT equipment, furniture) | 528                 | 1        |
| Mobile phone             | 45                  | 1        |
| <u>Subtotal</u>          | 573                 |          |
| <b><u>Total</u></b>      | <b>45,487</b>       |          |

Initial ambulance investment costs for 1 ambulance vehicle. Prices are expressed in USD with an exchange rate of 1 USD = 3,867.09 Malagasy Ariary (MGA) and 1 USD = 105.671 Japanese Yen (JPY) (costs marked \*).

1  
2 Supplementary File 3: Running costs  
3  
4

5  
6  
7  
8  
9

| Item                                               | Cost per unit (USD)                      | Quantity                           | Annual costs (USD) |
|----------------------------------------------------|------------------------------------------|------------------------------------|--------------------|
| <b>Transport</b>                                   |                                          |                                    |                    |
| Fuel                                               | Average: 0.98 USD/l<br>(0.91/l – 1.03/l) | Average 1471<br>/months (961-2051) | 1,729              |
| Insurance                                          | 44                                       | 1                                  | 44                 |
| Licensing in Madagascar                            | 194                                      | 1                                  | 194                |
| Maintenance                                        | 1,707                                    | Yearly average                     | 1,707              |
| Repair                                             | 467                                      | Yearly average                     | 467                |
| <u>Subtotal</u>                                    |                                          |                                    | 4,141              |
| <b>Car equipment</b>                               |                                          |                                    |                    |
| Air chamber for tire                               | 72                                       | 4                                  | 288                |
| Cleaning equipment (shovel, broom, brush, scraper) | 13                                       | 1                                  | 13                 |
| Tires                                              | 142                                      | 4                                  | 568                |
| <u>Subtotal</u>                                    |                                          |                                    | 869                |

10  
11  
12  
13  
14  
15  
16  
17  
18  
19  
20  
21  
22  
23  
24  
25  
26  
27  
28  
29  
30  
31  
32  
33  
34  
35  
36  
37  
38  
39  
40  
41  
42  
43  
44  
45  
46  
47  
48  
49  
50  
51  
52  
53  
54  
55  
56  
57  
58  
59  
60

| Item                                 | Cost per unit (USD) | Quantity | Annual costs (USD) |
|--------------------------------------|---------------------|----------|--------------------|
| <b>Consumables</b>                   |                     |          |                    |
| Cleaning materials                   | 1                   | 12       | 12                 |
| Drugs on board ambulance             | 49                  | 12       | 588                |
| Medical equipment on board ambulance | 36                  | 12       | 432                |
| Oxygen bottle                        | 43                  | 1        | 43                 |
| <u>Subtotal</u>                      |                     |          | 1,075              |
| <b>Pre-transport care</b>            |                     |          |                    |
| Drugs and consumables                | 78                  | 6        | 468                |



| Item                                  | Cost per unit (USD)                       | Quantity | Annual costs (USD) |
|---------------------------------------|-------------------------------------------|----------|--------------------|
| <b>Staff wages</b>                    |                                           |          |                    |
| Drivers                               | Average:<br>116/months (range<br>103-129) | 12       | 1,392              |
| Local coordinator                     | 413/month                                 | 12       | 4,956              |
| Midwives                              | 155/month                                 | 12       | 1,860              |
| <u>Subtotal</u>                       |                                           |          | 8,208              |
| <b>Communication</b>                  |                                           |          |                    |
| Free phone number for ambulance calls | 9/month**                                 | 12       | 108                |
| Phone credits driver                  | 5/month                                   | 12       | 60                 |
| Phone credits coordination            | 8/month                                   | 12       | 96                 |
| SIM card for GPS tracking of vehicles | 10/month                                  | 12       | 120                |
| <u>Subtotal</u>                       |                                           |          | 384                |

| Item                                                                                         | Cost per unit (USD) | Quantity                 | Annual costs (USD) |
|----------------------------------------------------------------------------------------------|---------------------|--------------------------|--------------------|
| <b>Performance-based bonuses</b>                                                             |                     |                          |                    |
| Medical director of participating CSBs                                                       | 55                  | 12                       | 660                |
| <b>Item</b>                                                                                  |                     |                          |                    |
| <b>Cost per unit (USD)</b>                                                                   |                     |                          |                    |
| <b>Quantity</b>                                                                              |                     |                          |                    |
| <b>Annual costs (USD)</b>                                                                    |                     |                          |                    |
| Midwife of participating CSBs                                                                | 70                  | 12                       | 840                |
| Additional remuneration during ambulance services (staff on extra duty for at least 4 hours) | 4                   | Average: 20 times/months | 960                |
| <b>Subtotal</b>                                                                              |                     |                          | 2,460              |
| <b>Training activities</b>                                                                   |                     |                          |                    |
| Yearly training for drivers                                                                  | 297*                | 1                        | 297                |
| <b>Administration</b>                                                                        |                     |                          |                    |
| Consumables                                                                                  | 128                 | 12                       | 1,536              |
| Electricity                                                                                  | 15                  | 12                       | 180                |
| Rent                                                                                         | 155                 | 12                       | 1,860              |
| <b>Subtotal</b>                                                                              |                     |                          | 3,576              |

---

**Total annual running costs****21,478**

---

Annual running costs for 1 ambulance vehicle. Prices are expressed in USD with an exchange rate of 1 USD = 3,867.09 Malagasy Ariary (MGA) and 1 USD = 0.840618 Euros (costs marked \*).

\*\* on average, depending on the number of calls received

For peer review only

## CHEERS 2022 Checklist

|                                                                       | Item | Guidance for Reporting                                                                                                                                                      | Reported in section        |
|-----------------------------------------------------------------------|------|-----------------------------------------------------------------------------------------------------------------------------------------------------------------------------|----------------------------|
| <b>TITLE</b>                                                          |      |                                                                                                                                                                             |                            |
| Title                                                                 | 1    | Identify the study as an economic evaluation and specify the interventions being compared.                                                                                  | Page 1                     |
| <b>ABSTRACT</b>                                                       |      |                                                                                                                                                                             |                            |
| Abstract                                                              | 2    | Provide a structured summary that highlights context, key methods, results and alternative analyses.                                                                        | Pages 2-3                  |
| <b>INTRODUCTION</b>                                                   |      |                                                                                                                                                                             |                            |
| Background and objectives                                             | 3    | Give the context for the study, the study question and its practical relevance for decision making in policy or practice.                                                   | Pages 4-5                  |
| <b>METHODS</b>                                                        |      |                                                                                                                                                                             |                            |
| Health economic analysis plan                                         | 4    | Indicate whether a health economic analysis plan was developed and where available.                                                                                         | Page 9                     |
| Study population                                                      | 5    | Describe characteristics of the study population (such as age range, demographics, socioeconomic, or clinical characteristics).                                             | Page 7                     |
| Setting and location                                                  | 6    | Provide relevant contextual information that may influence findings.                                                                                                        | Pages 5-6                  |
| Comparators                                                           | 7    | Describe the interventions or strategies being compared and why chosen.                                                                                                     | Pages 5-7                  |
| Perspective                                                           | 8    | State the perspective(s) adopted by the study and why chosen.                                                                                                               | Page 10                    |
| Time horizon                                                          | 9    | State the time horizon for the study and why appropriate.                                                                                                                   | Page 7                     |
| Discount rate                                                         | 10   | Report the discount rate(s) and reason chosen.                                                                                                                              | Page 15                    |
| Selection of outcomes                                                 | 11   | Describe what outcomes were used as the measure(s) of benefit(s) and harm(s).                                                                                               | Pages 9-10                 |
| Measurement of outcomes                                               | 12   | Describe how outcomes used to capture benefit(s) and harm(s) were measured.                                                                                                 | Page 15                    |
| Valuation of outcomes                                                 | 13   | Describe the population and methods used to measure and value outcomes.                                                                                                     | Pages 10-15                |
| Measurement and valuation of resources and costs                      | 14   | Describe how costs were valued.                                                                                                                                             | Pages 8-9                  |
| Currency, price date, and conversion                                  | 15   | Report the dates of the estimated resource quantities and unit costs, plus the currency and year of conversion.                                                             | Page 8-9                   |
| Rationale and description of model                                    | 16   | If modelling is used, describe in detail and why used. Report if the model is publicly available and where it can be accessed.                                              | Pages 10-15                |
| Analytics and assumptions                                             | 17   | Describe any methods for analysing or statistically transforming data, any extrapolation methods, and approaches for validating any model used.                             | Pages 11, 15               |
| Characterizing heterogeneity                                          | 18   | Describe any methods used for estimating how the results of the study vary for sub-groups.                                                                                  | Page 15                    |
| Characterizing distributional effects                                 | 19   | Describe how impacts are distributed across different individuals or adjustments made to reflect priority populations.                                                      |                            |
| Characterizing uncertainty                                            | 20   | Describe methods to characterize any sources of uncertainty in the analysis.                                                                                                | Pages 11, 15               |
| Approach to engagement with patients and others affected by the study | 21   | Describe any approaches to engage patients or service recipients, the general public, communities, or stakeholders (e.g., clinicians or payers) in the design of the study. | Pages 11-12                |
| <b>RESULTS</b>                                                        |      |                                                                                                                                                                             |                            |
| Study parameters                                                      | 22   | Report all analytic inputs (e.g., values, ranges, references) including uncertainty or distributional assumptions.                                                          | Pages 12-15, 18-20, Suppl. |
| Summary of main results                                               | 23   | Report the mean values for the main categories of costs and outcomes of interest and summarise them in the most appropriate overall measure.                                | Pages 20-23                |
| Effect of uncertainty                                                 | 24   | Describe how uncertainty about analytic judgments, inputs, or projections affect findings. Report the effect of choice of discount rate and time horizon, if applicable.    | Pages 23-24                |
| Effect of engagement with patients and others affected by the study   | 25   | Report on any difference patient/service recipient, general public, community, or stakeholder involvement made to the approach or findings of the study                     | Pages 11-12                |
| <b>DISCUSSION</b>                                                     |      |                                                                                                                                                                             |                            |
| Study findings, limitations, generalizability, and current knowledge  | 26   | Report key findings, limitations, ethical or equity considerations not captured, and how these could impact patients, policy, or practice.                                  | P. 25-27                   |
| <b>OTHER RELEVANT INFORMATION</b>                                     |      |                                                                                                                                                                             |                            |
| Source of funding                                                     | 27   | Describe how the study was funded and any role of the funder in the identification, design, conduct, and reporting of the analysis                                          | Page 3                     |
| Conflicts of interest                                                 | 28   | Report authors conflicts of interest according to journal or International Committee of Medical Journal Editors requirements.                                               | Page 3                     |

Husereau D, Drummond M, Augustovski F, de Bekker-Grob E, Briggs AH, Carswell C, Caulley L, Chaiyakunapruk N, Greenberg D, Loder E, Mauskopf J, Mullins CD, Petrou S, Pwu RF, Staniszevska S; CHEERS 2022 ISPOR Good Research Practices Task Force. Consolidated Health Economic Evaluation Reporting Standards 2022 (CHEERS 2022) Statement: Updated Reporting Guidance for Health Economic Evaluations. *BMJ*. 2022;376:e067975.

The checklist is Open Access distributed in accordance with the terms of the Creative Commons Attribution (CC BY 4.0) license, which permits others to distribute, remix, adapt and build upon this work, for commercial use, provided the original work is properly cited. See: <http://creativecommons.org/licenses/by/4.0/>.

# BMJ Open

## Inter-facility transfers for emergency obstetric and neonatal care in rural Madagascar: A cost-effectiveness analysis

|                                 |                                                                                                                                                                                                                                                                                                                                                                                                                                                                                                                                                |
|---------------------------------|------------------------------------------------------------------------------------------------------------------------------------------------------------------------------------------------------------------------------------------------------------------------------------------------------------------------------------------------------------------------------------------------------------------------------------------------------------------------------------------------------------------------------------------------|
| Journal:                        | <i>BMJ Open</i>                                                                                                                                                                                                                                                                                                                                                                                                                                                                                                                                |
| Manuscript ID                   | bmjopen-2023-081482.R1                                                                                                                                                                                                                                                                                                                                                                                                                                                                                                                         |
| Article Type:                   | Original research                                                                                                                                                                                                                                                                                                                                                                                                                                                                                                                              |
| Date Submitted by the Author:   | 06-Mar-2024                                                                                                                                                                                                                                                                                                                                                                                                                                                                                                                                    |
| Complete List of Authors:       | Franke, Mara; Charite Medical Faculty Berlin, Nordmann, Kim; RWTH Aachen University Frühauf, Anna; Charité - Universitätsmedizin Berlin Ranaivoson, Rinja; Doctors for Madagascar Rebaliha, Mahery; Doctors for Madagascar Rapanjato, Zavaniarivo; Doctors for Madagscar Bärnighausen, Till ; Heidelberg University, Heidelberg Institute of Global Health Müller, Nadine; Charite Medical Faculty Berlin Knauss, Samuel; Charite Universitätsmedizin Berlin Emmrich, Julius; Charité - Universitätsmedizin Berlin; Institute of Global Health |
| <b>Primary Subject Heading</b>: | Global health                                                                                                                                                                                                                                                                                                                                                                                                                                                                                                                                  |
| Secondary Subject Heading:      | Health services research, Obstetrics and gynaecology                                                                                                                                                                                                                                                                                                                                                                                                                                                                                           |
| Keywords:                       | Health economics < HEALTH SERVICES ADMINISTRATION & MANAGEMENT, NEONATOLOGY, OBSTETRICS, ACCIDENT & EMERGENCY MEDICINE                                                                                                                                                                                                                                                                                                                                                                                                                         |
|                                 |                                                                                                                                                                                                                                                                                                                                                                                                                                                                                                                                                |

SCHOLARONE™  
Manuscripts



I, the Submitting Author has the right to grant and does grant on behalf of all authors of the Work (as defined in the below author licence), an exclusive licence and/or a non-exclusive licence for contributions from authors who are: i) UK Crown employees; ii) where BMJ has agreed a CC-BY licence shall apply, and/or iii) in accordance with the terms applicable for US Federal Government officers or employees acting as part of their official duties; on a worldwide, perpetual, irrevocable, royalty-free basis to BMJ Publishing Group Ltd ("BMJ") its licensees and where the relevant Journal is co-owned by BMJ to the co-owners of the Journal, to publish the Work in this journal and any other BMJ products and to exploit all rights, as set out in our [licence](#).

The Submitting Author accepts and understands that any supply made under these terms is made by BMJ to the Submitting Author unless you are acting as an employee on behalf of your employer or a postgraduate student of an affiliated institution which is paying any applicable article publishing charge ("APC") for Open Access articles. Where the Submitting Author wishes to make the Work available on an Open Access basis (and intends to pay the relevant APC), the terms of reuse of such Open Access shall be governed by a Creative Commons licence – details of these licences and which [Creative Commons](#) licence will apply to this Work are set out in our licence referred to above.

Other than as permitted in any relevant BMJ Author's Self Archiving Policies, I confirm this Work has not been accepted for publication elsewhere, is not being considered for publication elsewhere and does not duplicate material already published. I confirm all authors consent to publication of this Work and authorise the granting of this licence.

1  
2  
3  
4 **1 TITLE**

5  
6 **2 Inter-facility transfers for emergency obstetric and neonatal care in rural Madagascar:**  
7  
8 **3 A cost-effectiveness analysis**

9  
10  
11  
12 **4 AUTHORS**

13  
14  
15 Mara Anna Franke<sup>1,2</sup>, Kim Nordmann<sup>2,3</sup>, Anna Frühauf<sup>1,2</sup>, Rinja Mitolotra Ranaivoson<sup>4</sup>,  
16  
17 Mahery Rebalih<sup>4</sup>, Zavaniarivo Rapanjato<sup>4</sup>, Till Bärnighausen<sup>5,6,7,8</sup>, Nadine Muller<sup>2,5,9</sup>,  
18  
19 Samuel Knauss<sup>1,2,5,10,11\*</sup>, Julius Valentin Emmrich<sup>1,2,5,10,11\*</sup>  
20  
21

22  
23 **8 Affiliations**

- 24  
25  
26  
27 9 1) Charité Global Health, Charité - Universitätsmedizin Berlin, Berlin, Germany  
28  
29 10 2) Ärzte für Madagaskar, Berlin, Germany  
30  
31 11 3) RWTH Aachen University, Aachen, Germany  
32  
33 12 4) Doctors for Madagascar, Antananarivo, Madagascar  
34  
35 13 5) Medical Faculty, University of Heidelberg, Institute of Global Health, Heidelberg,  
36  
37 Germany  
38  
39 14 6) University of Heidelberg, University Hospital, Heidelberg, Germany  
40  
41 15 7) Department of Global Health and Population, Chan School of Public Health, Boston,  
42  
43 16 7) Department of Global Health and Population, Chan School of Public Health, Boston,  
44  
45 17 Massachusetts, USA  
46  
47 18 8) Africa Health Research Institute, Somkhele and Durban, South Africa  
48  
49 19 9) Department of Infectious Diseases, Charité – Universitätsmedizin Berlin  
50  
51 20 10) Berlin, Germany; Berlin Institute of Health, Berlin, Germany  
52  
53 21 11) Department of Neurology with Experimental Neurology, Charité —  
54  
55  
56 22 Universitätsmedizin Berlin, Berlin, Germany  
57  
58  
59  
60 23

1  
2  
3 **24 Corresponding author**  
4  
5

6 **25** PD Dr. Julius Valentin Emmrich, Charité - Universitätsmedizin Berlin, Charitéplatz 1, 1107  
7  
8 **26** Berlin, Germany; E-Mail: [julius.emmrich@charite.de](mailto:julius.emmrich@charite.de)  
9  
10

11 **27 ABSTRACT**  
12  
13  
14

15 **28** *Context:* There is a substantial lack of inter-facility referral systems for emergency obstetric  
16  
17 **29** and neonatal care in rural areas of sub-Saharan Africa. Data on the costs and cost-  
18  
19 **30** effectiveness of such systems that reduce preventable maternal and neonatal deaths are  
20  
21 **31** scarce.  
22  
23  
24

25 **32** *Setting:* We aimed to determine the cost-effectiveness of an NGO-run inter-facility referral  
26  
27 **33** system for emergency obstetric and neonatal care in rural southern Madagascar by analyzing  
28  
29 **34** the characteristics of cases referred through the intervention as well as its costs.  
30  
31  
32

33 **35** *Design:* We used secondary NGO data, drawn from an NGO's monitoring and financial  
34  
35 **36** administration database, including medical and financial records.  
36  
37  
38

39 **37** *Outcome measures:* We performed a descriptive and a cost-effectiveness analysis, including a  
40  
41 **38** one-way deterministic sensitivity analysis.  
42  
43

44 **39** *Results:* 1,172 cases were referred over a period of 4 years. The most common referral reasons  
45  
46 **40** were obstructed labour, ineffective labour, and eclampsia. In total, 48 neonates were referred  
47  
48 **41** through the referral system over the study period. Estimated cost per referral were 336 USD  
49  
50 **42** and the incremental cost-effectiveness ratio (ICER) was 70 USD per additional life year  
51  
52 **43** saved (undiscounted, discounted 137 USD). The sensitivity analysis showed that the  
53  
54 **44** intervention was cost-effective for all scenarios with the lowest ICER at 99 USD and the  
55  
56 **45** highest ICER at 205 USD per additional life year saved. When extrapolated to the population  
57  
58  
59  
60



1  
2  
3 46 living in the study area, the investment costs of the program were 0.13 USD per person and  
4  
5 47 annual running costs 0.06 USD per person.  
6  
7  
8

9 48 *Conclusions:* In our study, the inter-facility referral system was a very cost-effective  
10  
11 49 intervention. Our findings may inform policies, decision making, and implementation  
12  
13 50 strategies for emergency obstetric and neonatal care referral systems in similar resource-  
14  
15 51 constrained settings.  
16  
17  
18

## 19 52 **ARTICLE SUMMARY**

### 20 53 **Strengths and limitations of this study**

- 21  
22  
23  
24  
25 54 • Strength: Large study sample from a widely understudied population in remote Southern  
26  
27 55 Madagascar  
28  
29  
30 56 • Limitation: Programmatic data and reliance of expert panel process for defining survival  
31  
32 57 rates  
33  
34 58 • Limitation: No long-term follow up data of patients available due to cross-sectional  
35  
36 59 nature of the study.  
37  
38  
39 60 • Strength: Robust CEA methodology, including detailed and comprehensive costing data  
40  
41

### 42 61 **KEYWORDS**

43  
44  
45 62 Sub-Saharan Africa, maternal health, Emergency obstetric and neonatal care, cost-  
46  
47 63 effectiveness analysis  
48  
49

### 50 64 **FUNDING STATEMENT**

51  
52  
53 65 This research received no specific grant from any funding agency in the public, commercial  
54  
55 66 or not-for-profit sectors.  
56  
57  
58  
59  
60

1  
2  
3  
4  
5  
6  
7  
8  
9  
10  
11  
12  
13  
14  
15  
16  
17  
18  
19  
20  
21  
22  
23  
24  
25  
26  
27  
28  
29  
30  
31  
32  
33  
34  
35  
36  
37  
38  
39  
40  
41  
42  
43  
44  
45  
46  
47  
48  
49  
50  
51  
52  
53  
54  
55  
56  
57  
58  
59  
60

67 **CONFLICT OF INTERESTS**

68 The authors declare no conflicts of interest.

69 **DATA SHARING**

70 The original data are available from the corresponding author upon reasonable request.

71 **WORD COUNT**

72 3,404

For peer review only

## 73 BACKGROUND

74 Reducing the global maternal mortality ratio to less than 70 per 100,000 live births by 2030 is  
75 a key target of the Sustainable Development Goals [1]. Haemorrhage, sepsis, unsafe abortion,  
76 and other complications of delivery account for more than 50% of maternal deaths in sub-  
77 Saharan Africa (SSA) [2]. Most neonatal deaths in SSA are attributable to either intrapartum  
78 complications or complications linked to preterm delivery [3]. Many of these fatalities are  
79 preventable through access to timely and high-quality emergency obstetric care (EmOC).

80 However, mothers and neonates in SSA often experience significant delays in accessing  
81 EmOC services, i.e., when deciding to seek, reaching, and receiving adequate care [4]).

82 Access to and availability of adequate means of transportation, including ambulance referral  
83 services to EmOC centres, reduces these delays [5,6], which, in turn, reduces maternal and  
84 neonatal mortality [7,8].

85 The implementation of ambulance referral systems for EmOC services in SSA have been  
86 described for several, mostly rural contexts, including in Uganda [9,10], Burundi [11], and  
87 Ethiopia [12]. They mostly differed in the type of referral service provided (i.e., from home  
88 to health facility versus inter-facility referral) and the level of medical support provided to  
89 patients during referrals. Only a minority of these programs have been evaluated through a  
90 cost-effectiveness analysis [9, 12].

91 Africa's health financing gap is estimated at 66 billion USD annually and the financing need  
92 for maternal and child health services is particularly acute [13,14]. Thus, reliable data on  
93 costs and cost-effectiveness of ambulance programs are essential for designing and  
94 prioritizing maternal health interventions in SSA.

95 We aimed to describe case and service characteristics as well as analyse the costs and cost-  
96 effectiveness of an EmOC inter-facility referral system established by a non-governmental

1  
2  
3 97 organization (NGO) in rural Madagascar. Our findings may inform policies, decision making  
4  
5 98 and implementation strategies for EmOC referral systems in resource-constrained settings.  
6  
7

8 99  
9

## 10 100 **METHODS**

### 11 101 **Study design**

12  
13  
14  
15  
16  
17  
18 102 This is a retrospective study using secondary data, routinely collected as part of an NGO  
19  
20 103 intervention. A data-sharing agreement with the NGO was in place.  
21  
22

### 23 104 **Study area and context**

24  
25  
26  
27 105 The study took place in Atsimo-Andrefana, Androy, and Anosy, rural regions in the South of  
28  
29 106 Madagascar. Poverty rates in the study region are high with over 80% of the population living  
30  
31 107 of less than 1.90\$ per day [15]. Nationally, neonatal, and maternal mortality ratios remain  
32  
33 108 high with a maternal mortality ratio 335 per 100,000 and a neonatal mortality ratio of 20 per  
34  
35 109 1,000 live births, respectively [16].  
36  
37  
38

39  
40 110 The Malagasy health system is organized in 3 tiers of care. While some public emergency  
41  
42 111 referral services exist at the district and national level, they fall short of covering a significant  
43  
44 112 amount of the population, especially in rural areas of the country.  
45  
46  
47

### 48 113 **Intervention**

#### 49 114 **Setting**

50  
51  
52  
53  
54  
55 115 To improve access to EmOC, the German-Malagasy NGO Doctors for Madagascar  
56  
57 116 established an inter-facility referral system for obstetric and neonatal care in Atsimo-  
58  
59 117 Andrefana (Ampanihy, Betioky-sud, and Benenitra districts), Androy (Bekily district), and  
60

1  
2  
3 118 Anosy region (Fort-Dauphin district). The intervention covered a catchment population of  
4  
5 119 around 1 million people (Malagasy Ministry of health, “Sectorisation”, 2020). The  
6  
7 120 intervention was rolled out sequentially, starting in Atsimo-Andrefana and Androy in 2016  
8  
9 121 and in Anosy in 2018. A 4-wheel drive ambulance was stationed at each of 3 secondary  
10  
11 122 referral hospitals: Hopitaly Zoara Fotadrevo, Hopitaly SALFA Manambaro, and Hopitaly  
12  
13 123 SALFA Ejeda, which served 18, 23, and 13 participating primary health centres, respectively  
14  
15 124 Secondary referral hospitals offer inpatient care surgical care, obstetric care, including  
16  
17 125 emergency C-sections, and basic neonatal care.  
18  
19  
20  
21  
22  
23 126 Participating primary health centres (locally known as Centers de Santé de Base (CSB); n =  
24  
25 127 54) could call the ambulance 24h per day without charge. If referral was deemed necessary  
26  
27 128 by a trained medical dispatcher, the ambulance was sent to the CSB to transfer the patient to a  
28  
29 129 higher-level care facility. The referral was free for patients and participating health centres,  
30  
31 130 all costs were covered by the NGO.  
32  
33  
34

### 35 131 Vehicles and equipment

36  
37  
38  
39 132 All ambulances were Toyota 4-wheel drive vehicles, equipped with a stretcher, oxygen,  
40  
41 133 emergency medical equipment, and drugs. Supplementary File 1 summarizes the medical  
42  
43 134 equipment and drugs, which were available on board an ambulance vehicle.  
44  
45  
46

47 135 To improve pre-transport emergency care, the NGO equipped participating CSBs with  
48  
49 136 emergency kits containing alcohol, compresses, cotton swabs, isotonic glucose solution,  
50  
51 137 isotonic saline, intravenous catheters, IV lines, scissors, sterile and non-sterile gloves, and  
52  
53 138 urinary catheters. These kits were checked and refilled by NGO staff after each referral.  
54  
55  
56

### 57 139 Emergency medical teams

58  
59  
60

1  
2  
3 140 All calls from CSBs requesting a referral were processed by a medical emergency dispatcher,  
4  
5 141 usually a medical doctor trained in EmOC and familiar with the local setting. If the dispatcher  
6  
7 142 deemed a referral to be necessary, a vehicle was sent to retrieve the patient from the CSB.  
8  
9

10  
11 143 The medical team aboard each vehicle always consisted of a trained midwife and a driver  
12  
13 144 who had received basic life support training. If necessary, a medical doctor accompanied  
14  
15 145 critical referrals. The medical doctor was an employee of the implementing NGO and  
16  
17 146 accompanied approximately 5% of referrals. This decision was made on a case-by-case basis  
18  
19 147 by the dispatcher.  
20  
21  
22

23  
24 148 Performance-based bonus payments  
25

26  
27 149 The referring healthcare worker received a cash bonus of 2.5 USD for each case referred  
28  
29 150 through the intervention, paid at the end of the month.  
30  
31

32  
33 151 Participants  
34

35  
36 152 All women who presented at one of the participating CSBs during the intervention period  
37  
38 153 with an acute complication during pregnancy, childbirth, or postpartum and whose  
39  
40 154 emergency referral was deemed necessary by the medical dispatcher were eligible to  
41  
42 155 participate. Similarly, all neonates born or treated at participating CSBs within the neonatal  
43  
44 156 period of 28 days and whose emergency referral was deemed necessary by the medical  
45  
46 157 dispatcher were eligible to participate.  
47  
48  
49

50  
51 158 All obstetric and neonatal patients using the ambulance referral system between January 5<sup>th</sup>,  
52  
53 159 2016, and September 30<sup>th</sup>, 2020, were included in the descriptive analysis.  
54  
55

56  
57 160 Mothers and neonates presenting at CSBs not participating in the intervention were not  
58  
59 161 eligible for ambulance referral.  
60

1  
2  
3 162 Patients could refuse referral services at any point in time.  
4  
5

6  
7 163 **Data collection and data entry**  
8

9  
10 164 Medical records  
11

12  
13 165 The data source for patient and referral characteristics were case data sheets filled by the  
14  
15 166 ambulance staff. These data sheets included details on patient characteristics (e.g., gestational  
16  
17 167 age) and the referral indication.  
18  
19

20  
21 168 All data were digitized into summary Excel tables by NGO personnel. Healthcare staff, who  
22  
23 169 were not otherwise involved in this study, replaced patient identifying information with  
24  
25 170 numerical pseudonyms before forwarding the Excel sheets to the research team for analysis.  
26  
27 171 Codes linking pseudonyms and identifying information were not accessible to the research  
28  
29 172 team.  
30  
31

32  
33  
34 173 We collected the original data in French and translated it into English. Data were cleaned by  
35  
36 174 3 independent researchers with regular check-ups to assure consistency in data cleaning. Data  
37  
38 175 were additionally cross-checked and screened for double entries, out-of-range values, and  
39  
40 176 overall consistency. In case multiple referral indications were given, an expert panel of 3  
41  
42 177 Malagasy physicians determined the main referral indication, which were grouped following  
43  
44 178 the approach by Abegunde et al. [17]. All data were stored in a password-protected database  
45  
46 179 to which only the research team had access.  
47  
48  
49

50  
51 180 Financial records  
52

53  
54  
55 181 The data source for the costs of the intervention were NGO financial records from 2016 to  
56  
57 182 2019. A researcher extracted data from the original records and categorized them into  
58  
59 183 investment and running costs and corresponding sub-categories (medical equipment,  
60

1  
2  
3 184 administration, transport, communication, consumables, pre-transport care, performance-  
4  
5 185 based bonus payments, and training activities). Costs were classified as investment costs, if  
6  
7 186 they were one-time costs paid for the initial set-up of the intervention (e.g. costs for the  
8  
9 187 ambulance vehicles). Conversely, costs were defined as running costs if they were recurring  
10  
11 188 costs necessary to continue programmatic activities (e.g. fuel costs).

12  
13  
14 189 Investment costs were annualized based on lifetime estimates or records of items based on  
15  
16 190 expert estimates from NGO staff active in the study region.

17  
18  
19  
20 191 We included all costs associated with the initial establishment of the referral systems, e.g.,  
21  
22 192 acquisition of equipment and ambulances, as well as running costs for the 3 project sites in  
23  
24 193 the cost-effectiveness analysis (CEA). Costs for treatments at CSBs and referral hospitals  
25  
26 194 were not included, as those were not supported through the program. Data were collected in  
27  
28 195 Malagasy Ariary or Japanese Yen (1 invoice) and converted to United States dollars for  
29  
30 196 analysis (Exchange rate: 1 USD = 3,867.09 Malagasy Ariary (as of September 22nd, 2020)  
31  
32 197 and 1 USD = 105.671 Japanese Yen (as of September 30th, 2020).

33  
34  
35  
36  
37 198

## 38 39 40 199 **Data analysis**

### 41 42 43 200 Descriptive statistics

44  
45  
46  
47 201 We performed a descriptive analysis, including frequency distributions, for medical records  
48  
49 202 using Stata Version 16.

### 50 51 52 203 Cost-effectiveness analysis

53  
54  
55  
56 204 We used a cost-effectiveness analysis to quantify the costs per life year saved, as well as the  
57  
58 205 incremental cost-effectiveness ratio of the intervention. As this was not a randomised control  
59  
60



1  
2  
3 206 trial, we did not develop a health economic analysis plan. We also assessed the sensitivity of  
4  
5 207 the analysis to variation of parameters. We adhere to the CHEERS guideline for economic  
6  
7 208 evaluations of healthcare interventions in structuring this manuscript [18].  
8  
9

10  
11 209 The main outcomes of the model were incremental cost-effectiveness ratios (ICER) per life  
12  
13 210 year saved through the intervention overall, and separately by cohort, where one cohort was  
14  
15 211 defined as all cases referred due to the same referral indication. To calculate the costs for  
16  
17 212 each cohort, we multiplied the average costs per referral with the number of patients per  
18  
19 213 cohort. For each cohort, we calculated the following incremental cost-effectiveness ratio  
20  
21 214 (ICER):  $(\text{Costs of ambulance referral system} - \text{Costs of no referral system}) / ((\text{Life years saved}$   
22  
23 215  $\text{neonates referred} + \text{Life years saved mothers referred}) - (\text{Life years saved neonates not}$   
24  
25 216  $\text{referred} + \text{Life years saved mothers not referred}))$ . To obtain the overall ICER of the  
26  
27 217 intervention, we added the ICERs for individual cohorts, weighted by the frequency of their  
28  
29 218 occurrence.  
30  
31

32  
33  
34 219

## 35 36 220 Study population and model

37  
38 221 This economic evaluation followed a cost-effectiveness analysis, with a healthcare provider's  
39  
40 222 perspective. For each medical condition that constituted a referral indication, we developed 1  
41  
42 223 decision analytical model (if the condition affected only mother or neonate,  $n = 8$  models) or 2  
43  
44 224 (if the condition affected both mother and neonate,  $n = 9$  models) intervention cohorts, as  
45  
46 225 well as the corresponding number of control cohorts ( $n = 17$  models). The starting age for  
47  
48 226 mothers in the models was 24 years and 0 years for neonates. Individuals from the  
49  
50 227 intervention cohorts were referred to secondary hospitals, while individuals from comparison  
51  
52 228 cohorts were not referred and received only primary care. For all models, a time horizon of  
53  
54 229 100 years was chosen to anticipate lifetime.  
55  
56  
57  
58  
59  
60

1  
2  
3 230 Supplementary files 2 and 3 outline the non-reversible patient journey for referred and non-  
4  
5 231 referred mothers and referred and non-referred neonates, respectively. For the intervention  
6  
7 232 cohort, the patient journey consisted of the following stages: i) initial presentation at the  
8  
9 233 health centre with a certain pathology, ii) likelihood of referral to a higher level of care, iii)  
10  
11 234 likelihood of survival upon reaching the referral hospital, and iv) follow-up period after the  
12  
13 235 referral for which all-cause mortality was applied. For the control group, the patient journey  
14  
15 236 differed in that it lacked the stage of referral. It consisted of the following stages: i) initial  
16  
17 237 presentation at the health centre with a certain pathology, ii) likelihood of survival with a  
18  
19 238 given pathology at the primary care level.  
20  
21  
22  
23  
24 239 For all cohorts, all-cause mortality was calculated on an annual basis, whereas the first 2  
25  
26 240 stages for the comparison groups and the first 3 stages for the intervention groups were  
27  
28 241 treated as one time stamp.  
29  
30  
31  
32  
33  
34

35 244 We applied these exclusion criteria for the CEA: date of referral not during the study period;  
36  
37 245 referral indication unknown or unrelated to emergency obstetric and neonatal care; referral  
38  
39 246 indications with less than 10 cases.  
40  
41  
42  
43  
44  
45  
46

#### 47 249 Pathway probabilities

48  
49 250 Medical records were used to determine the number of mothers and neonates treated at  
50  
51 251 participating CSBs for each referral indication.  
52  
53  
54  
55

56 253 Given that there was no previously published data for this context, survival rates for both  
57  
58 254 referred and non-referred mothers and neonates were estimated through a two-stage expert  
59  
60

255 panel process. 3 Malagasy physicians, otherwise not involved in this study formed the expert  
 256 panel. They were chosen as a convenience sample, as they were familiar with the NGO's  
 257 intervention and had long-term experience in maternal health in the intervention area.

258

259 The research team reviewed existing literature from low- and middle-income countries on  
 260 maternal survival rates for all referral indications. Both Google Scholar and PubMed were  
 261 searched to identify relevant studies. From these, we extracted data on survival rates for  
 262 individual referral indications at primary and secondary facilities as well as information on  
 263 study design, context, strengths, and limitations. We presented these data to the expert panel.  
 264 The panel then defined survival rates for each referral indication. Results of this expert panel  
 265 process are summarized in Table 1 and 2 below. For each condition, the expert panel defined  
 266 a maximum and minimum survival rate for mothers and neonates at both primary and  
 267 secondary facilities, as well as an average survival rate agreed upon by all experts. This rate  
 268 formed the baseline estimate for our CEA models.

269

270 Table 1: Survival estimates mothers

| Referral indications mothers (n) | Survival rates when referred to secondary care |     |          | Survival rates when not-referred (primary care only) |     |          | References   |
|----------------------------------|------------------------------------------------|-----|----------|------------------------------------------------------|-----|----------|--------------|
|                                  | Min                                            | Max | Baseline | Min                                                  | Max | Baseline |              |
| Obstructed labour (251)          | 95%                                            | 99% | 98%      | 80%                                                  | 99% | 90%      | [19, 20, 21] |
| Ineffective                      | 98%                                            | 99% | 99%      | 85%                                                  | 99% | 95%      | [22, 23, 24] |

## labour (137)

|              |     |     |     |    |    |    |              |
|--------------|-----|-----|-----|----|----|----|--------------|
| Extrauterine | 99% | 95% | 99% | 1% | 0% | 0% | [25, 26, 27] |
|--------------|-----|-----|-----|----|----|----|--------------|

## gravidity (50)

|             |     |     |     |     |     |     |      |
|-------------|-----|-----|-----|-----|-----|-----|------|
| Post-partum | 70% | 90% | 80% | 20% | 80% | 30% | [28] |
|-------------|-----|-----|-----|-----|-----|-----|------|

## haemorrhage

## (46)

|              |     |     |     |     |     |     |      |
|--------------|-----|-----|-----|-----|-----|-----|------|
| Intrauterine | 90% | 99% | 95% | 85% | 95% | 93% | [29] |
|--------------|-----|-----|-----|-----|-----|-----|------|

## foetal death

## (IUD) (45)

|           |     |     |     |     |     |     |              |
|-----------|-----|-----|-----|-----|-----|-----|--------------|
| Eclampsia | 65% | 96% | 75% | 30% | 90% | 50% | [30, 31, 32] |
|-----------|-----|-----|-----|-----|-----|-----|--------------|

## (39)

|          |     |     |     |     |     |     |              |
|----------|-----|-----|-----|-----|-----|-----|--------------|
| Placenta | 85% | 98% | 87% | 50% | 95% | 70% | [33, 34, 35, |
|----------|-----|-----|-----|-----|-----|-----|--------------|

## previa (34)

36]

|               |     |     |     |     |     |     |      |
|---------------|-----|-----|-----|-----|-----|-----|------|
| Abortion (30) | 90% | 99% | 95% | 85% | 95% | 90% | [37] |
|---------------|-----|-----|-----|-----|-----|-----|------|

|         |     |     |     |     |     |     |      |
|---------|-----|-----|-----|-----|-----|-----|------|
| Risk of | 99% | 99% | 99% | 99% | 98% | 99% | [28] |
|---------|-----|-----|-----|-----|-----|-----|------|

## premature

## delivery (26)

|          |     |     |     |     |     |     |          |
|----------|-----|-----|-----|-----|-----|-----|----------|
| Placenta | 99% | 99% | 99% | 50% | 99% | 91% | [38, 39] |
|----------|-----|-----|-----|-----|-----|-----|----------|

## retention (25)

|               |     |     |       |     |     |       |      |
|---------------|-----|-----|-------|-----|-----|-------|------|
| Delivery (22) | 98% | 99% | 98.5% | 95% | 99% | 96.5% | [28] |
|---------------|-----|-----|-------|-----|-----|-------|------|

|           |     |     |     |     |     |     |          |
|-----------|-----|-----|-----|-----|-----|-----|----------|
| Infection | 90% | 98% | 95% | 70% | 95% | 80% | [40, 41] |
|-----------|-----|-----|-----|-----|-----|-----|----------|

|                             |     |     |       |     |     |       |                  |
|-----------------------------|-----|-----|-------|-----|-----|-------|------------------|
| postpartum<br>(19)          |     |     |       |     |     |       |                  |
| Risk of uterus rupture (17) | 90% | 95% | 92.5% | 5%  | 40% | 35%   | [42, 43, 44, 45] |
| Fetal distress (12)         | 98% | 99% | 98.5% | 70% | 99% | 96.5% | [46, 47, 48]     |
| Malaria (12)                | 98% | 99% | 99%   | 95% | 98% | 97.5% | [49]             |

271 Table 1. Minimum, maximum, and baseline survival estimates for referred and non-referred  
 272 mothers grouped by referral indication. Survival estimates were obtained by expert panel  
 273 consensus.

274  
 275 Table 2: Survival estimates neonates

| Referral indications neonates (n) | Survival rates when referred to secondary care |     |          | Survival rates when not-referred (primary care only) |     |          | References   |
|-----------------------------------|------------------------------------------------|-----|----------|------------------------------------------------------|-----|----------|--------------|
|                                   | Min                                            | Max | Baseline | Min                                                  | Max | Baseline |              |
| Obstructed labour (251)           | 60%                                            | 90% | 70%      | 25%                                                  | 80% | 35%      | [19, 20, 21] |
| Ineffective labour (137)          | 45%                                            | 95% | 55%      | 30%                                                  | 88% | 35%      | [22, 23, 24] |

|                                 |     |     |     |     |     |     |                    |
|---------------------------------|-----|-----|-----|-----|-----|-----|--------------------|
| Eclampsia (39)                  | 30% | 80% | 50% | 15% | 50% | 25% | [30, 31, 32]       |
| Placenta previa (34)            | 50% | 95% | 60% | 20% | 90% | 30% | [33,34, 35, 36]    |
| Risk of premature delivery (26) | 15% | 98% | 70% | 15% | 97% | 25% | [50, 51]           |
| Delivery (22)                   | 85% | 98% | 92% | 75% | 95% | 85% | [28]               |
| Risk of uterus rupture (17)     | 20% | 93% | 90% | 3%  | 40% | 10% | [42, 43, , 44, 45] |
| Fetal distress (12)             | 70% | 99% | 95% | 30% | 98% | 55% | [46, 47, 48]       |
| Respiratory distress (12)       | 5%  | 90% | 20% | 1%  | 50% | 5%  | [52,53]            |
| Malaria (12)                    | 90% | 98% | 95% | 90% | 94% | 91% | [42]               |
| Neonatal infection (10)         | 5%  | 85% | 70% | 5%  | 80% | 50% | [50, 54]           |

---

277 Table 2. Minimum, maximum and baseline survival estimates for referred and non-referred  
 278 neonates grouped by referral indication. Survival estimates were obtained by expert panel  
 279 consensus.  
 280  
 281 Life years

1  
2  
3 282 Health outcomes were estimated based on local life expectancy tables [55]. Costs and life-  
4  
5 283 years saved were discounted at a 3% discount rate. This rate reflects the average annual  
6  
7  
8 284 growth of the Malagasy economy during the study period [56] and aligns with the approach  
9  
10 285 for discounting in economic evaluation suggested by Haacker et al. [57].  
11

12 286

### 14 287 Sensitivity analysis

16  
17 288 Given that no probabilistic data was available in the literature, we performed a one-way  
18  
19 289 deterministic sensitivity analysis for the survival rates for referred and non-referred mothers  
20  
21 290 and neonates to assess the impact of individual model parameters and assumptions on the  
22  
23 291 model outputs.  
24

25  
26 292

### 28 293 **Patient and public involvement statement**

30  
31 294 This study did not involve patients in the research process. However, we did involve three  
32  
33 295 independent Malagasy clinicians in the research process as key informants for the expert  
34  
35 296 panel process to define survival probabilities for the different patient pathways. This greatly  
36  
37 297 enhanced the applicability and relevance of our research for the context of Southern  
38  
39 298 Madagascar.  
40

41  
42 299

### 44 300 **Ethics approval and consent to participate**

46  
47 301 Ethical clearance for the study was obtained from the Heidelberg University Hospital Ethics  
48  
49 302 Committee, registration number: S-713/2020. Informed consent was waived by the ethics  
50  
51 303 committee.  
52  
53  
54  
55  
56  
57  
58  
59  
60

## 304 RESULTS

### 305 Referral characteristics

306 In total, 1,172 patients (48 neonates and 1,124 women, respectively) were referred through  
307 the intervention. Most referrals took place in Atsimo-Andrefana region (54%), followed by  
308 Anosy (45%) and Androy regions (1%). The average distance per referral were 52.8 km.

309

### 310 Demographic and clinical characteristics

311 Mean age of women was 23.6 years (n=1,118; IQR=12). Most neonates (78%, 36/46) were in  
312 their first week of life. 80% of calls were made for direct obstetric causes above all for  
313 obstructed/prolonged labour (40%, 445/1,124) (Table 3). For neonates, the most common  
314 referral indications were respiratory distress (29%, 14/48) or infection (21%, 10/48) (Table  
315 4).



316 Table 3: Referral reasons mothers

| <b>Obstetric complication</b>                                        | <b>Women (n=1,124)</b> | <b>(%)</b> |
|----------------------------------------------------------------------|------------------------|------------|
| Direct causes                                                        | 906                    | 80.6       |
| Abortion and its complications, including intra-uterine foetal death | 89                     | 7.9        |
| Ectopic pregnancy                                                    | 52                     | 4.6        |
| Embolism                                                             | 1                      | 0.1        |
| Hypertensive disorders                                               | 61                     | 5.4        |
| Prepartum/postpartum haemorrhage                                     | 114                    | 10.1       |
| Obstetric trauma                                                     | 18                     | 1.6        |
| Obstructed/prolonged labour                                          | 445                    | 39.6       |
| Other direct causes                                                  | 141                    | 12.5       |
| Indirect causes                                                      | 123                    | 10.9       |
| Anaemia                                                              | 7                      | 0.6        |
| Malaria                                                              | 12                     | 1.1        |
| Tuberculosis                                                         | 1                      | 0.1        |
| Other indirect causes                                                | 88                     | 7.9        |
| Other cases*                                                         | 37                     | 3.3        |
| No obstetric complication specified                                  | 58                     | 5.2        |

\*Such as: no medical staff present at CSB, insufficient equipment for delivery at CSB

1  
2  
3 317 Complications during pregnancy, childbirth, and postpartum, which triggered the referral of  
4  
5 318 mothers (n =1,124) from participating CSBs to secondary referral hospitals. CSB, Centre de  
6  
7 319 Santé de Base (public primary care facility).  
8  
9  
10  
11  
12  
13  
14  
15  
16  
17  
18  
19  
20  
21  
22  
23  
24  
25  
26  
27  
28  
29  
30  
31  
32  
33  
34  
35  
36  
37  
38  
39  
40  
41  
42  
43  
44  
45  
46  
47  
48  
49  
50  
51  
52  
53  
54  
55  
56  
57  
58  
59  
60

For peer review only

320 Table 4: Referral reasons neonates

| Complication           | Neonates | %    |
|------------------------|----------|------|
|                        | (n=48)   |      |
| Abdominal bloating     | 3        | 6.3  |
| Birth defect           | 9        | 18.8 |
| Dehydration            | 4        | 8.3  |
| Hypothermia            | 1        | 2.1  |
| Icterus                | 1        | 2.1  |
| Unspecified infection* | 10       | 20.8 |
| Premature birth        | 4        | 8.3  |
| Respiratory distress   | 14       | 29.2 |
| Syphilis               | 1        | 2.1  |
| Other (=vomiting)      | 1        | 2.1  |

\*Unspecified infection included neonates showing signs of infection such as fever, altered cardiorespiratory status or marmorated skin.

321 Complications during the neonatal period, which triggered the referral of neonates (n= 48)

322 from participating CSBs to secondary referral hospitals.

323

324 Not all calls resulted in a completed referral. In 97 cases the ambulance was dispatched but

325 the referral was not completed. Most commonly (65%, 63/97) the complication had been

326 resolved at the CSB either with (25%, 24/97) or without (40%, 39/97) support from the

327 ambulance staff. In 8 cases (8.2%) the woman or neonate had passed away before the

328 ambulance reached the CSB and in 4 cases (4.1%) the patient or patient's relatives refused

329 the referral.

**330 Costs**

331 The total intervention costs over the study period were 394,197 USD.

332 Supplementary File 4 and 5 show the detailed distribution of cost of operating 1 vehicle over  
333 the intervention time frame (January 2016-September 2020).

334 The average cost per referral was 367 USD (n=1075).

335 If the costs of the project were shared among all people living in the project area, initial  
336 investment costs would be 0.13 USD per person and annual running costs 0.06 USD per  
337 person.

338 Around 20% of the population in the study region are women of reproductive age. Assuming  
339 that each of these women could be a potential beneficiary of the project, the costs per  
340 potential beneficiary amount to 0.57 USD per person in investment and 0.26 USD in annual  
341 running costs.

**342 Cost-effectiveness analysis**

343 Incremental life-years saved through the program were 37,882 (rounded to the full year)  
344 undiscounted and 4,872 when discounted at 3%.

345 The overall ICER of the ambulance system was 70 USD per additional life year saved  
346 undiscounted and 137 USD per additional life year saved when discounted at 3%.

347 The ambulance intervention proved particularly cost-effective for cases of extrauterine  
348 gravidity, risk of uterus rupture, and post-partum haemorrhages with ICERs of less than 30  
349 (discounted at 3%). The program proved least effective for cases of malaria in pregnancy and  
350 post-partum infection. Table 5 below lists the costs per life year saved as well as the ICER  
351 per diagnosis.

352 Table 5: Results of CEA

| <b>Referral indication (n)</b>           | <b>Cost per life year saved<br/>discounted/undiscounted<br/>(USD)</b> | <b>ICER discounted/undiscounted</b> |
|------------------------------------------|-----------------------------------------------------------------------|-------------------------------------|
| Obstructed labour (251)                  | 11.2/5.9                                                              | 62.9/30.1                           |
| Ineffective labour (137)                 | 11.7/6.2                                                              | 115.1/54.7                          |
| Extrauterine gravidity<br>(50)           | 14.4/8.0                                                              | 14.4/8.0                            |
| Post-partum<br>haemorrhage (46)          | 17.1/9.5                                                              | 26.4/14.6                           |
| Intrauterine foetal death<br>(IUID) (45) | 15.0/8.3                                                              | 710.9/394.0                         |
| Eclampsia (39)                           | 14.8/7.8                                                              | 40.1/20.7                           |
| Placenta previa (34)                     | 12.3/6.5                                                              | 57.8/28.3                           |
| Abortion (30)                            | 15.0/8.3                                                              | 284.3/157.6                         |
| Risk of premature<br>delivery (26)       | 11.0/5.8                                                              | 72.9/32.7                           |

|                                      |            |             |
|--------------------------------------|------------|-------------|
| Placenta retention (25)              | 14.3/7.9   | 171.3/94.9  |
| Delivery (22)                        | 10.4/5.4   | 288.5/138.9 |
| Infection postpartum<br>(19)         | 59.9/33.2  | 379.1/210.1 |
| Risk of uterus rupture<br>(17)       | 10.9/5.7   | 15.6/8.0    |
| Fetal distress (12)                  | 10.3/5.3   | 76./34.5    |
| Malaria (12)                         | 10.3/5.3   | 447.8/217.8 |
| Respiratory distress<br>neonate (12) | 170.2/75.8 | 227.0/101.0 |
| Neonatal infection (10)              | 48.6/21.7  | 107.2/75.6  |

353 Table 5: Costs per life-year saved (in USD) and ICER per diagnosis, undiscounted and

354 discounted at 3%.

355 Sensitivity analysis

356 The sensitivity analysis showed the intervention to remain cost-effective for most scenarios

357 tested. However in the following cases either the survival rate estimates at the participating

358 CSB exceeded the baseline estimate at the referral hospital or the worst case estimate at the

359 hospital was lower than the baseline estimate at the CSB, rendering the scenario not cost

360 effective: Mothers survival for eclampsia, neonates survival for ineffective labour, neonate

1  
2  
3 361 survival for neonatal infection, neonates survival for respiratory distress and neonates  
4

5 362 survival for risk of premature delivery tested.  
6

7  
8 363  
9

10  
11  
12  
13  
14  
15  
16  
17  
18  
19  
20  
21  
22  
23  
24  
25  
26  
27  
28  
29  
30  
31  
32  
33  
34  
35  
36  
37  
38  
39  
40  
41  
42  
43  
44  
45  
46  
47  
48  
49  
50  
51  
52  
53  
54  
55  
56  
57  
58  
59  
60

For peer review only

## 364 DISCUSSION

365 The aim of this study was to evaluate the characteristics, costs, and cost-effectiveness of an  
366 NGO-run inter-facility referral system for EmOC in rural Madagascar.

367 This study revealed three main findings: First, the most common referral indication for  
368 mothers was obstructed/prolonged labour and unspecified infection or respiratory distress for  
369 neonates. Second, the largest drivers of costs for the intervention were initial investment costs  
370 for the vehicles and running costs including staff wages. Consequently, ambulance lifespan is  
371 a particularly important determinant of the intervention's cost-effectiveness. Lastly, the CEA  
372 demonstrated the intervention to be very cost-effective, with an ICER of 137 USD per  
373 additional life year saved (discounted at 3%). The intervention was particularly cost-effective  
374 for the following conditions: extrauterine gravidity, risk of uterus rupture, and post-partum  
375 haemorrhage. The sensitivity analysis conducted showed the intervention to remain cost-  
376 effective in most scenarios tested. While there are no other studies evaluating similar  
377 interventions in Madagascar, our intervention shows itself to be more cost-effective than  
378 other CEAs conducted in Madagascar, which reported ICERs of 1023 USD per QALY  
379 gained for an intervention expanding access to antibiotics for plague care and prevention  
380 [58], 177 USD per DALY averted for a drone-supported community treatment programm for  
381 TB [59], and 531.2 USD per DALY averted [60] for the Indoor-residual spraying activities of  
382 the national tuberculosis control programm, showing our intervention to have a much lower  
383 ICER.

384 In accordance with our findings, other systems for EmOC referral in SSA have found direct  
385 obstetric complications, especially abortion and obstructed labour to be the main referral  
386 indications for mothers to secondary health facilities in resource-constrained settings [11, 12].



1  
2  
3 387 Compared with other ambulance referral systems in Uganda [9], Burundi [11] and Ethiopia  
4  
5 388 [12], costs for our intervention were high. This finding is however not surprising considering  
6  
7 389 that referrals in other interventions were not accompanied by trained medical personnel  
8  
9 390 receiving salaries. Neither ambulance carried medical equipment and neither publication  
10  
11 391 included overhead costs such as administrative costs in their cost-effectiveness analysis. In  
12  
13 392 addition, our intervention covered a large rural area in the remote south of Madagascar; there  
14  
15 393 were no paved roads and conditions deteriorated during the rainy season when parts of the  
16  
17 394 intervention became inaccessible. This increased costs for vehicle maintenance and fuel.  
18  
19 395 These differences in the design of the interventions as well as their contexts of  
20  
21 396 implementation likely explain the higher ICER of 137 USD per additional life year saved  
22  
23 397 (discounted) when compared to ICERs of 16 USD [9] and 25 USD per additional life year  
24  
25 398 saved [12] in Uganda and Ethiopia, respectively. Further, these studies only included referrals  
26  
27 399 in their analysis which were deemed “undoubtedly effective” [9,12], i.e., cases in which the  
28  
29 400 referral was likely to have a large impact on life-years saved. Our model on the other hand  
30  
31 401 included all cases in the calculation of the overall ICER.  
32  
33  
34 402 Consequently, costs per referral were higher for our setting than in other studies. Tayler-  
35  
36 403 Smith et al. reported costs of 61 USD per referral, with 1,478 ambulance referrals per year  
37  
38 404 [11], compared to 1,075 completed referrals over 4 years, with an average cost per referral of  
39  
40 405 367 USD in our setting.  
41  
42  
43 406 Regarding the per capita costs, our intervention compares preferably, with investment costs  
44  
45 407 of 0.13 USD per person and annual running costs 0.06 USD per person, when extrapolated to  
46  
47 408 the entire population serviced. This is lower than what has been reported in other rural  
48  
49 409 settings, for example in Burundi (€ 0.43/capita/year) [11], suggesting that the intervention  
50  
51 410 described here served a larger population at comparable costs and suggesting that the  
52  
53  
54  
55  
56  
57  
58  
59  
60

1  
2  
3 411 intervention could be sustainable, even in a setting where most of the population lives in  
4  
5 412 extreme poverty [61]. The fact that the referral system has such low per capita costs and a  
6  
7  
8 413 lower ICER than components already incorporated into the national malaria control program  
9  
10 414 in Madagascar [60], suggests that the referral system described herein could be feasibly  
11  
12 415 adapted into the national care system in Madagascar.

13  
14  
15 416 Our study has three main strengths: First, we used secondary NGO data as the basis for all  
16  
17 417 analyses. This reduced the potential for erroneous data as there was no need to rely on  
18  
19 418 estimations. Further, our data provide insights into a particularly vulnerable and resource-  
20  
21 419 constrained setting for which data is otherwise hard to obtain. Second, we included all costs  
22  
23 420 for the running of the ambulance system in the cost-effectiveness analysis, including  
24  
25 421 overhead costs such as administrative costs, rendering more realistic cost estimates than other  
26  
27 422 studies. Third, we obtained survival estimates using a multi-step expert consensus process,  
28  
29 423 when these data were not available from the literature.

30  
31  
32 424 Our study has several limitations. First, we were constrained by the availability of  
33  
34 425 programmatic data and had to rely on expert opinions to estimate equipment lifespans as well  
35  
36 426 as survival rates for the economic model. For the latter, to mitigate potential bias we  
37  
38 427 established an expert panel consensus process to estimate survival rates. This may have led to  
39  
40 428 an over- or underestimation of survival rates for the different conditions included in the  
41  
42 429 model, as expert opinion builds on subjective experience, not representative data. Despite  
43  
44 430 these limitations of expert opinion, however, they are commonly used in cost-effectiveness  
45  
46 431 analyses in the absence of stronger data to estimate model parameters, as was the case in our  
47  
48 432 setting [62]. Additionally, we drew on the available literature from similar settings in sub-  
49  
50 433 Saharan Africa to put the estimates obtained from the expert panel process into context and  
51  
52 434 verify for any outliers or implausible values. Second, data were not available on mothers'  
53  
54 435 post-delivery complications or their previous patient history to allow for more nuanced

1  
2  
3 436 calculations for life years saved and our model only accounted for mothers and neonates, for  
4  
5 437 whom referral was successful. However, we do not expect either factor to have a large impact  
6  
7 438 on the model's cost-effectiveness and are confident that the approach of constructing separate  
8  
9 439 models per cohort can robustly identify the most cost-effective applications of inter-facility  
10  
11 440 EmOC referrals. Last, we did not assess whether the intervention met the referral needs of the  
12  
13 441 population in the study area.  
14  
15  
16  
17

## 18 442 **CONCLUSION**

19  
20  
21 443 Our study is the first to report the cost-effectiveness of an EmOC inter-facility referral system  
22  
23 444 in Madagascar. We find the intervention to have been very cost-effective, especially for cases  
24  
25 445 requiring surgical care. Our findings highlight the need for a comprehensive approach to  
26  
27 446 providing rural EmOC services and may provide guidance on public health resource  
28  
29 447 allocation in Madagascar.  
30  
31  
32  
33  
34  
35  
36  
37  
38  
39  
40  
41  
42  
43  
44  
45  
46  
47  
48  
49  
50  
51  
52  
53  
54  
55  
56  
57  
58  
59  
60

1  
2  
3 **449 AUTHOR CONTRIBUTIONS**  
4

5 450 MAF, AF, KN, NM, SK, and JVE developed the study design in collaboration with TB.  
6

7 451 MAF, AF, RMR, MR, ZR and KN were responsible for data collection and study  
8

9 452 administration. MAF, AF, KN, NM, RMR, ZR, SK, and JVE contributed to the analysis.  
10

11 453 MAF, AF, and KN prepared the first draft of the manuscript. All authors contributed to  
12

13 454 writing the manuscript. All authors read and approved the final manuscript.  
14

15  
16  
17 455  
18

19 **456 ACKNOWLEDGEMENTS**  
20

21 457 We thank all midwives and ambulance drivers from Ejeda, Fotadrevo and Manambaro for  
22

23 458 collecting the data that support the findings of this study.  
24  
25  
26  
27  
28  
29  
30  
31  
32  
33  
34  
35  
36  
37  
38  
39  
40  
41  
42  
43  
44  
45  
46  
47  
48  
49  
50  
51  
52  
53  
54  
55  
56  
57  
58  
59  
60

1  
2  
3 459 **REFERENCES**  
4  
5

- 6 460 [1] World Health Organization: Maternal mortality: Levels and trends 200 to 2017.  
7  
8 461 <https://www.who.int/publications/i/item/9789241516488>. 2019. Accessed: 10.03.2021.  
9  
10  
11  
12 462 [2] Say L, Chou D, Gemmill A, et al.. Global causes of maternal death: a WHO systematic  
13  
14 463 analysis. *Lancet Glob Health*. 2014; doi:10.1016/S2214-109X(14)70227-X.  
15  
16  
17  
18 464 [3] Liu L, Oza S, Hogan D, et al. Global, regional, and national causes of child mortality in  
19  
20 465 2000–13, with projections to inform post-2015 priorities: an updated systematic analysis.  
21  
22 466 *Lancet*. 2015; doi://doi.org/10.1016/S0140-6736(14)61698-6.  
23  
24  
25  
26 467 [4] Thaddeus S and Maine D. Too far to walk: Maternal mortality in context. *Soc Sci Med*.  
27  
28 468 1994; doi:[https://doi.org/10.1016/0277-9536\(94\)90226-7](https://doi.org/10.1016/0277-9536(94)90226-7).  
29  
30  
31 469 [5] Kyei-Nimakoh M, Carolan-Olah M, McCann, TV. Access barriers to obstetric care at  
32  
33 470 health facilities in sub-Saharan Africa—a systematic review. *Syst Rev*. 2017;  
34  
35 471 doi:<https://doi.org/10.1186/s13643-017-0503-x>.  
36  
37  
38  
39 472 [6] Schmitz MM, Serbanescu F, Arnott GE, et al. Referral transit time between sending and  
40  
41 473 first-line receiving health facilities: a geographical analysis in Tanzania. *BMJ Glob Health*.  
42  
43 474 2019; doi: 8. doi:10.1136/ bmjgh-2019-001568.  
44  
45  
46  
47 475 [7] Mgawadere F, Unkels R, Kazembe A, et al. Factors associated with maternal mortality in  
48  
49 476 Malawi: application of the three delays model. *BMC Pregnancy Childbirth*. 2017;  
50  
51 477 doi:10.1186/s12884-017-1406-5.  
52  
53  
54  
55 478 [8] Wilmot E, Yotebieng M, Norris A. et al. Missed Opportunities in Neonatal Deaths in  
56  
57 479 Rwanda: Applying the Three Delays Model in a Cross-Sectional Analysis of Neonatal Death.  
58  
59 480 *Matern Child Health*. 2017; doi:<https://doi.org/10.1007/s10995-016-2210-y>.

- 1  
2  
3 481 [9] Somigliana E, Sabino A, Nkurunziza R, et al. Ambulance service within a comprehensive  
4  
5 482 intervention for reproductive health in remote settings: a cost-effective intervention. Trop  
6  
7 483 Med Int Health. 2011; doi:<https://doi.org/10.1111/j.1365-3156.2011.02819.x>  
8  
9  
10  
11 484 [10] de Ramirez SS, Doll J, Carle S, et al. Emergency response in resource-poor settings: a  
12  
13 485 review of a newly-implemented EMS system in rural Uganda. Prehosp Disaster Med. 2014;  
14  
15 486 doi:10.1017/S1049023X14000363.  
16  
17  
18  
19 487 [11] Tayler-Smith K, Zachariah R, Manzi M, et al. An ambulance referral network improves  
20  
21 488 access to emergency obstetric and neonatal care in a district of rural Burundi with high  
22  
23 489 maternal mortality. Trop Med Int Health. 2013; doi:<https://doi.org/10.1111/tmi.12121>  
24  
25  
26  
27 490 [12] Accorsi S, Somigliana E, Solomon H. et al. Cost-effectiveness of an ambulance-based  
28  
29 491 referral system for emergency obstetrical and neonatal care in rural Ethiopia. BMC  
30  
31 492 Pregnancy Childbirth. 2017; doi:<https://doi.org/10.1186/s12884-017-1403-8>  
32  
33  
34  
35 493 [13] UNECA: Healthcare and Economic Growth in Africa. UNECA. 2019.  
36  
37 494 <https://repository.uneca.org/handle/10855/43118> Accessed 14 Jun 2021.  
38  
39  
40  
41 495 [14] Dingle A, Schäferhoff M, Borghi J, et al. Estimates of aid for reproductive, maternal,  
42  
43 496 newborn, and child health: findings from application of the Muskoka2 method. Lancet Glob  
44  
45 497 Health. 2020; doi: [10.1016/S2214-109X\(20\)30005-X](https://doi.org/10.1016/S2214-109X(20)30005-X).  
46  
47  
48  
49 498 [15] The World Bank: The face of poverty in Madagascar.  
50  
51 499 <http://documents1.worldbank.org/curated/en/538821468271809604/pdf/781310PRIORITY0>  
52  
53 500 [English0Apr900May012.pdf](http://documents1.worldbank.org/curated/en/538821468271809604/pdf/781310PRIORITY0) (2014). Accessed 28 Nov 2020.  
54  
55  
56  
57 501 [16] The World Bank Data Bank. The World Bank. 2019.  
58  
59 502 <https://data.worldbank.org/indicator/SH.DYN.NMRT?locations=MG>. Accessed 28 Aug 2020.  
60

- 1  
2  
3 503 [17] Abegunde D, Kabo IA, Sambisa W, et al.. Availability, utilization, and quality of  
4  
5 504 emergency obstetric care services in Bauchi State, Nigeria. *Int J Gynaecol Obstet*.  
6  
7 505 2015;128:251–55.  
8  
9  
10  
11 506 [18] Husereau D, Drummond M, Petrou S, et al. Consolidated Health Economic Evaluation  
12  
13 507 Reporting Standards (CHEERS) statement *BMJ* 2013; 346 :f1049 doi:10.1136/bmj.f1049  
14  
15  
16 508 [19] Omole-Ohonsi and Ashimi. Obstructed Labour – A Six Year Review in Aminu Kano  
17  
18 509 Teaching Hospital, Kano, Nigeria. *Nigerian Medical Practitioner*. 2007;  
19  
20 510 doi:10.4314/nmp.v51i4.28843.  
21  
22  
23  
24 511 [20] Kabakyenga JK, Östergren PO, Turyakira E. et al. Individual and health facility factors  
25  
26 512 and the risk for obstructed labour and its adverse outcomes in south-western Uganda. *BMC*  
27  
28 513 *Pregnancy Childbirth*. 2011; doi:<https://doi.org/10.1186/1471-2393-11-73>  
29  
30  
31  
32 514 [21] Gessesew and Mesfin. Obstructed Labour in Adigrat Zonal Hospital, Tigray Region,  
33  
34 515 Ethiopia. *Ethiop J Health Dev*. 2003;17:3.  
35  
36  
37  
38 516 [22] Ekanem EI, Umoiyoho A, and Inyang-Out A. Study of Electrolyte Changes in Patients  
39  
40 517 with Prolonged Labour in Ikot Ekpene, a Rural Community in Niger Delta Region of Nigeria.  
41  
42 518 *Int Sch Res Notices*. 2012; doi: <https://doi.org/10.5402/2012/430265>  
43  
44  
45  
46 519 [23] Thonneau PF, Matsudai T, Alihonou E, et al. Distribution of causes of maternal  
47  
48 520 mortality during delivery and post-partum: results of an African multicentre hospital-based  
49  
50 521 study. *Eur J Obstet Gynecol Reprod Bio*. 2004;  
51  
52 522 doi:<https://doi.org/10.1016/j.ejogrb.2003.12.004>.  
53  
54  
55  
56 523 [24] Ajenifuja KO, Adepiti CA, Ogunniyi SO. Post partum haemorrhage in a teaching  
57  
58 524 hospital in Nigeria: a 5-year experience. *Afr Health Sci*. 2010;10:1.  
59  
60

- 1  
2  
3 525 [25] Etuknwa BT, Azu OO, Peter AI, et al. Ectopic pregnancy: A Nigerian urban experience.  
4  
5 526 Korean Journal of Obstetrics & Gynecology. 2021;  
6  
7 527 doi:<https://doi.org/10.5468/KJOG.2012.55.5>.  
8  
9  
10  
11 528 [26] Fouedjio JH, Fouelifack YF, Fouogue TJ, et al. Clinical features of extra-uterine  
12  
13 529 pregnancy in Cameroon: a review of 148 cases at the Yaounde Central Hospital. Facts Views  
14  
15 530 Vis Obygn. 2018;10(3):165-168.  
16  
17  
18  
19 531 [27] Dattijo LM, El-Nafaty AU, Aminu BM, et al. Ectopic Pregnancy in Bauchi, North-East  
20  
21 532 Nigeria. Trop J Obstet Gynaecol. 2014;31:1.  
22  
23  
24  
25 533 [28] Besaina R, Randriamahavonjy R, Laingo R, et al. Maternal mortality related to  
26  
27 534 postpartum hemorrhage: a case-control study at the Befelatanana maternity of Madagascar.  
28  
29 535 Int J Reprod Contracept Obstet Gynecol. 2018; doi:10.18203/2320-1770.ijrcog20185406.  
30  
31  
32  
33 536 [29] Bailey PE, Anduaem W, Brun M. et al. Institutional maternal and perinatal deaths: a  
34  
35 537 review of 40 low and middle income countries. BMC Pregnancy Childbirth. 2017;  
36  
37 538 doi:<https://doi.org/10.1186/s12884-017-1479-1>.  
38  
39  
40  
41 539 [30] Yakasai and Gaya. Maternal and fetal outcome in patients with eclampsia at Murtala  
42  
43 540 Muhammad specialist Hospital Kano, Nigeria. Ann Afr Med. 2011; doi:10.4103/1596-  
44  
45 541 3519.87049.  
46  
47  
48  
49 542 [31] Ratsiatosika AT, Razafimanantsoa E, Andriantoky VB, et al. Incidence and natural  
50  
51 543 history of preeclampsia/eclampsia at the university maternity of Antananarivo, Madagascar:  
52  
53 544 high prevalence of the early-onset condition. J Matern Fetal Neonatal Med. 2019;  
54  
55 545 doi:10.1080/14767058.2018.1462323.  
56  
57  
58  
59  
60



- 1  
2  
3 546 [32] Adekanle and Akinbile. Eclampsia and Pregnancy Outcome at Lautech Teaching  
4  
5 547 Hospital, Osogbo, SouthWest, Nigeria. Clin Mother Child Health. 2021;  
6  
7 548 doi:10.4303/cmch/C120301.  
8  
9  
10  
11 549 [33] Berhan. Predictors of Perinatal Mortality Associated with Placenta Previa and Placental  
12  
13 550 Abruptio: An Experience from a Low Income Country. J Pregnancy. 2014;  
14  
15 551 doi:https://doi.org/10.1155/2014/307043.  
16  
17  
18  
19 552 [34] Anzaku and Musa. Placenta Praevia: Incidence, Risk Factors, Maternal and Fetal  
20  
21 553 Outcomes in a Nigerian Teaching Hospital. Jos J Med. 2012;6:1.  
22  
23  
24 554 [35] Burodo and Shehu. Placenta praevia at Usmanu Danfodiyo University Teaching  
25  
26 555 Hospital, Sokoto: A 5-year review. Sahel Med J. 2013;16:2:56-9.  
27  
28  
29  
30 556 [36] Kongnyuy EJ, Kouam L, Ngassa P et al.. Placenta praevia: epidemiology and  
31  
32 557 management at the University Teaching Hospital (CHU) Yaounde. Clin Mother Child Health.  
33  
34 558 2004;1:2.  
35  
36  
37  
38 559 [37] Goyaux N, Alihonou E, Diadhiou F, et al. Complications of induced abortion and  
39  
40 560 miscarriage in three African countries: a hospital-based study among WHO collaborating  
41  
42 561 centers. Acta Obstet Gynecol Scand. 2001;80(6):568-73.  
43  
44  
45  
46 562 [38] Beltman J, van den Akker T, Van Lonkhuijzen L, et al. Beyond maternal mortality:  
47  
48 563 obstetric hemorrhage in a Malawian district. Acta Obstet Gynecol Scand. 2011;  
49  
50 564 doi:https://doi.org/10.1111/j.1600-0412.2011.01219.  
51  
52  
53  
54 565 [39] Owolabi AT, Dare FO, Fasubaa OB, et al. Risk factors for retained placenta in  
55  
56 566 southwestern Nigeria. Singapore Med J. 2008;49:532-7.  
57  
58  
59  
60

- 1  
2  
3 567 [40] Ngonzi J, Bebell LM, Fajardo Y., et al. Incidence of postpartum infection, outcomes,  
4  
5 568 and associated risk factors at Mbarara regional referral hospital in Uganda. *BMC Pregnancy*  
6  
7 569 *Childbirth*. 2018; doi:<https://doi.org/10.1186/s12884-018-1891-1>  
8  
9  
10  
11 570 [41] Rwabizi D, Rulisa S, Aidan F. et al. Maternal near miss and mortality due to postpartum  
12  
13 571 infection: a cross-sectional analysis from Rwanda. *BMC Pregnancy Childbirth*. 2016;  
14  
15 572 doi:<https://doi.org/10.1186/s12884-016-0951-7>.  
16  
17  
18  
19 573 [42] Kidanto HL, Mwampagatwa I, Van Roosemalen J. Uterine rupture: a retrospective  
20  
21 574 analysis of causes, complications and management outcomes at Muhimbili National Hospital  
22  
23 575 in Dar es Salaam, Tanzania. *Tanzan J Health Res*. 2012 doi:10.4314/thrb.v14i3.9.  
24  
25  
26  
27 576 [43] Kadowa. Ruptured uterus in rural Uganda: prevalence, predisposing factors, and  
28  
29 577 outcomes. *Singapore Med J*. 2010;51:1: 35.  
30  
31  
32  
33 578 [44] Strand RT, Tumba P, Niekowal J, et al. Audit of cases with uterine rupture: A process  
34  
35 579 indicator of quality of obstetric care in Angola. *Afr J Reprod Health*. 2010:14:2.  
36  
37  
38  
39 580 [45] Ahmed DM, Mengistu TS, Endalamaw AG. Incidence and factors associated with  
40  
41 581 outcomes of uterine rupture among women delivered at Felegehiwot referral hospital, Bahir  
42  
43 582 Dar, Ethiopia: cross sectional study. *BMC Pregnancy Childbirth*. 2018;  
44  
45 583 doi:<https://doi.org/10.1186/s12884-018-2083-8>.  
46  
47  
48  
49 584 [46] Adanikin and Awoleke. Clinical suspicion, management, and outcome of intrapartum  
50  
51 585 foetal distress in a public hospital with limited advanced foetal surveillance. *J Matern Fetal*  
52  
53 586 *Neonatal Med*. 2017; doi:<https://doi.org/10.1080/14767058.2016.117499>.  
54  
55  
56  
57  
58  
59  
60

- 1  
2  
3 587 [47] Rotich SK, Ndavi MP, Rukaria-Kaumbutho R, et al. Early perinatal outcome in cases  
4  
5 588 delivered through caesarian section following clinical diagnosis of severe foetal distress at  
6  
7 589 Kenyatta National Hospital. *East Afr Med J.* 2006;83:5.
- 9  
10  
11 590 [48] Oladapo OT, Sotimehin SA, Ayoola-Sotubo O. Predictors of Severe Neonatal  
12  
13 591 Compromise Following Caesarean Section for Clinically Diagnosed Foetal Distress. *West*  
14  
15 592 *Afr J Med.* 2009; doi:10.4314/wajm.v28i5.55014.
- 17  
18  
19 593 [49] Menéndez C, Bardaji A, Sigauque B et al.. Malaria Prevention with IPTp during  
20  
21 594 Pregnancy Reduces Neonatal Mortality. *PlosOne.* 2010; doi:10.1371/journal.pone.0009438.
- 23  
24 595 [50] Hoque M, S Haaq S, Islam R. Causes of neonatal admissions and deaths at a rural  
25  
26 596 hospital in KwaZulu-Natal, South Africa. *South Afr J Epidemiol Infect.* 2011;  
27  
28 597 doi:10.1080/10158782.2011.11441416.
- 30  
31  
32 598 [51] Mahande MJ, Daltveit AK, Obure J, et al. Recurrence of preterm birth and perinatal  
33  
34 599 mortality in northern Tanzania: registry-based cohort study. 2013;  
35  
36 600 doi:<https://doi.org/10.1111/tmi.12111>.
- 38  
39  
40 601 [52] Tochie JN, Choukem SP, Langmia, RN, et al. Neonatal respiratory distress in a reference  
41  
42 602 neonatal unit in Cameroon: an analysis of prevalence, predictors, etiologies, and outcomes.  
43  
44 603 *Pan Afr Med J.* 2016;24:1.
- 46  
47  
48 604 [53] Andegiorgish AK, Andemariam M, Temesghen S. et al. Neonatal mortality and  
49  
50 605 associated factors in the specialized neonatal care unit Asmara, Eritrea. *BMC Public Health.*  
51  
52 606 2020; doi:<https://doi.org/10.1186/s12889-019-8118-x>.
- 53  
54  
55  
56  
57  
58  
59  
60

- 1  
2  
3 607 [54] Gezmu AM, Bulabula ANH, Dramowski A et al.. Laboratory-confirmed bloodstream  
4  
5 608 infections in two large neonatal units in sub-Saharan Africa. *Int J Infect Dis.* 2021;  
6  
7 609 doi:<https://doi.org/10.1016/j.ijid.2020.11.169>.  
8  
9  
10  
11 610 [55] Life tables by country. World Health Organization, Geneva. 2020.  
12  
13 611 <https://apps.who.int/gho/data/view.main.60970?lang=en>. Accessed 30 Apr 2021.  
14  
15  
16 612 [56] Tableau du Bord économique N 42°. Institut National de la Statistique, Antananarivo.  
17  
18 613 2021. [https://www.instat.mg/documents/upload/main/INSTAT\\_TBE42\\_01-](https://www.instat.mg/documents/upload/main/INSTAT_TBE42_01-)  
19  
20 614 [2021.pdf](https://www.instat.mg/documents/upload/main/INSTAT_TBE42_01-2021.pdf). Accessed 24 May 2021.  
21  
22  
23  
24 615 [57] Haacker M, Hallett TB, Atun R. On discount rates for economic evaluations in global  
25  
26 616 health. *Health Policy Plan.* 2020; doi:<https://doi.org/10.1093/heapol/czz127>.  
27  
28  
29  
30 617 [58] Malloy, G.S.P.; Brandeau, M.L.; Goldhaber-Fiebert, J.D. Modeling the Cost-  
31  
32 618 Effectiveness of Interventions to Prevent Plague in Madagascar. *Trop. Med. Infect. Dis.*  
33  
34 619 2021, 6, 101. <https://doi.org/10.3390/tropicalmed6020101>.  
35  
36  
37  
38 620 [59] Bahrainwala L, Knoblauch AM, Andriamiadanarivo A, Diab MM, McKinney J, Small  
39  
40 621 PM, et al. (2020) Drones and digital adherence monitoring for community-based tuberculosis  
41  
42 622 control in remote Madagascar: A cost-effectiveness analysis. *PLoS ONE* 15(7): e0235572.  
43  
44 623 <https://doi.org/10.1371/journal.pone.0235572>  
45  
46  
47  
48 624 [60] Voahirana T Andrianantoandro, Martine Audibert, Thomas Kesteman, Léonora  
49  
50 625 Ravolanjarasoa, Milijaona Randrianarivelosia, et al.. Cost of the national malaria control  
51  
52 626 program and cost-effectiveness of indoor residual spraying and insecticide-treated bed nets  
53  
54 627 strategies in two districts of Madagascar. 2021. {hal-03249411}

1  
2  
3 628 [61] Poverty headcount ratio at (2011 PPP) (% of population). The World Bank Group,  
4  
5 629 Washington DC.  
6  
7 630 [https://data.worldbank.org/indicator/SI.POV.DDAY?end=2017&locations=1W&name\\_desc=  
8 https://data.worldbank.org/indicator/SI.POV.DDAY?end=2017&locations=1W&name\\_desc=  
9 true&start=1981&view=chart. Accessed 11 Mar 2021.](https://data.worldbank.org/indicator/SI.POV.DDAY?end=2017&locations=1W&name_desc=true&start=1981&view=chart)  
10  
11  
12

13 632 [62] Soares MO, Sharples L, Morton A, Claxton K, Bojke L. Experiences of Structured  
14  
15 633 Elicitation for Model-Based Cost-Effectiveness Analyses. Value Health. 2018 Jun;21(6):715-  
16  
17 634 723. doi: 10.1016/j.jval.2018.01.019. Epub 2018 Apr 25.  
18  
19  
20  
21

22 635

23  
24  
25 636

26  
27  
28 637  
29  
30  
31  
32  
33  
34  
35  
36  
37  
38  
39  
40  
41  
42  
43  
44  
45  
46  
47  
48  
49  
50  
51  
52  
53  
54  
55  
56  
57  
58  
59  
60

1  
2  
3 **638 SUPPLEMENTARY FILE LEGENDS**  
4  
5

6 **639** Supplementary file 2. Non-reversible patient journey for referred and non-referred mothers.

8  
9 **640** For referred mothers, the model included 4 stages: 1) presentation at a participating CSB

10  
11 **641** because of an emergency during pregnancy or childbirth, 2) referral to secondary referral

12  
13 **642** hospital, 3) likelihood of survival at referral hospital, 4) all-cause mortality. The model

14  
15 **643** included 3 stages for non-referred mothers: 1) presentation at a CSB because of an

16  
17 **644** emergency during pregnancy or childbirth, 2) likelihood of survival at CSB, 3) all-cause

18  
19 **645** mortality. CSB, Centre de Santé de Base (public primary care facility).  
20  
21  
22

23 **646**

24  
25 **647** Supplementary file 3. Non-reversible patient journey for referred and non-referred neonates.

26  
27 **648** For referred neonates the model included 4 stages: 1) presentation at a CSB because of an

28  
29 **649** emergency peripartum or in the neonatal period, 2) referral to secondary referral hospital, 3)

30  
31 **650** likelihood of survival at referral hospital, 4) all-cause mortality. For non-referred neonates,

32  
33 **651** the model included 3 stages: 1) presentation at a CSB because of an emergency peripartum or

34  
35 **652** in the neonatal period, 2) likelihood of survival at CSB, 3) all-cause mortality. CSB, Centre

36  
37 **653** de Santé de Base (public primary care facility).  
38  
39  
40  
41  
42  
43  
44  
45  
46  
47  
48  
49  
50  
51  
52  
53  
54  
55  
56  
57  
58  
59  
60

1  
2 Supplementary File 1: Ambulance furnishings  
3  
4

5 **Medical equipment**

6 **Drugs**

- 
- 7  
8  
9
- |                                 |                                |
|---------------------------------|--------------------------------|
| 10 ● Alcohol                    | 10 ● Analgesics                |
| 11 ● Betadine                   | 11 ○ Paracetamol               |
| 12 ● Blood sugar testing strips | 12 ● Antibiotics               |
| 13 ● Cord clamps                | 13 ○ Ampicillin                |
| 14 ● Echography gel             | 14 ○ Amoxicillin               |
| 15 ● Intravenous catheters      | 15 ● Antihypertensive agents   |
| 16 ● Non-sterile compresses     | 16 ○ Magnesium Sulphate        |
| 17 ● Non-sterile gloves         | 17 ○ Nicardipine               |
| 18 ● IV lines                   | 18 ● Infusion solutions        |
| 19 ● Plasters                   | 19 ○ Isotonic Glucose solution |
| 20 ● Pregnancy test             | 20 ○ Isotonic saline           |
| 21 ● Sterile compresses         | 21 ○ Lactated Ringer's         |
| 22 ● Sterile gloves             | 22 ○ Sodium Chloride           |
| 23 ● Ultrasound machine         | 23 ● Uterotonic agents         |
| 24 ● Urinary catheters and bags | 24 ○ Misoprostol               |
|                                 | 25 ○ Oxytocin                  |
|                                 | 26 ● Other                     |
|                                 | 27 ○ Calcium gluconate         |
|                                 | 28 ○ Diazepam                  |
|                                 | 29 ○ Paracetamol               |
|                                 | 30 ○ Salbutamol                |
|                                 | 31 ○ Tranexamic acid           |
|                                 | 32 ○ Vitamin K                 |
- 

33  
34  
35  
36  
37  
38  
39  
40  
41  
42  
43  
44  
45  
46  
47  
48  
49  
50  
51  
52 Medical equipment and drugs available aboard ambulance vehicles.  
53  
54  
55  
56  
57  
58  
59  
60

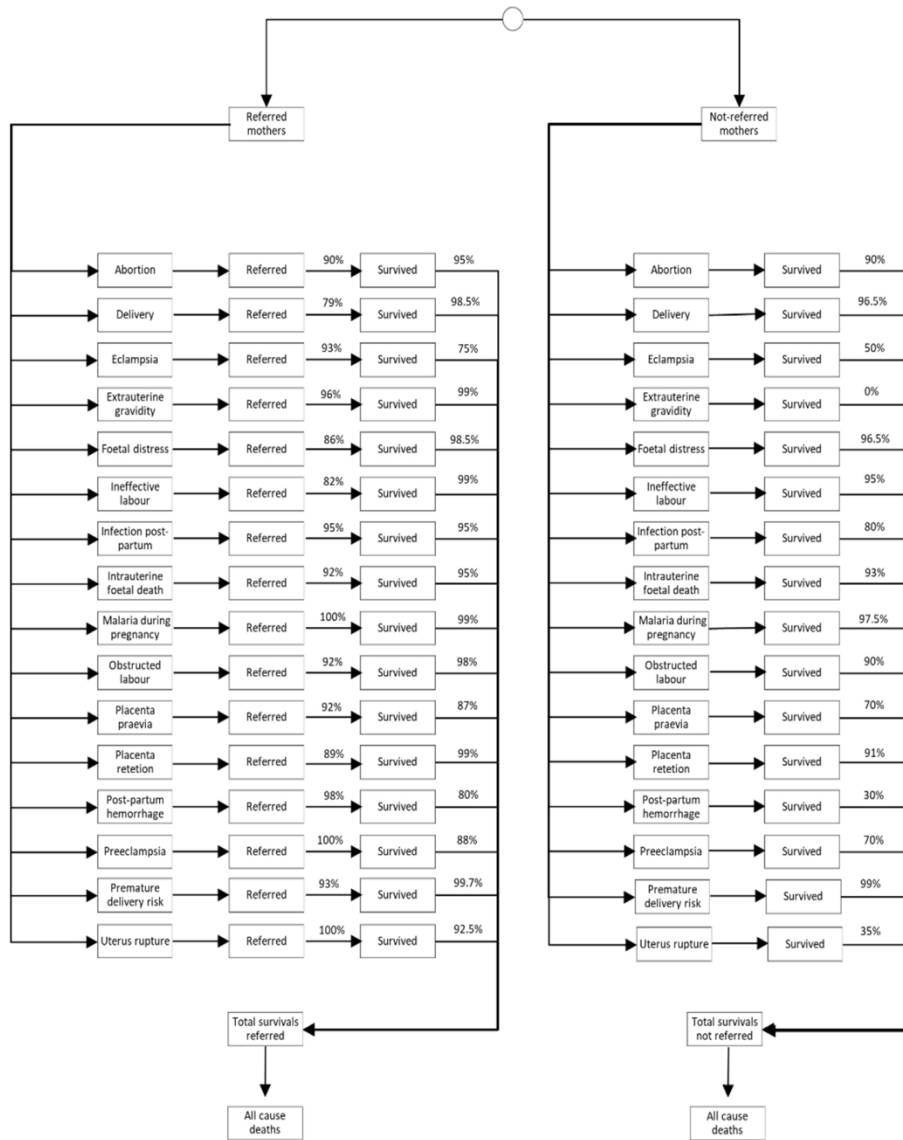

453x560mm (87 x 87 DPI)



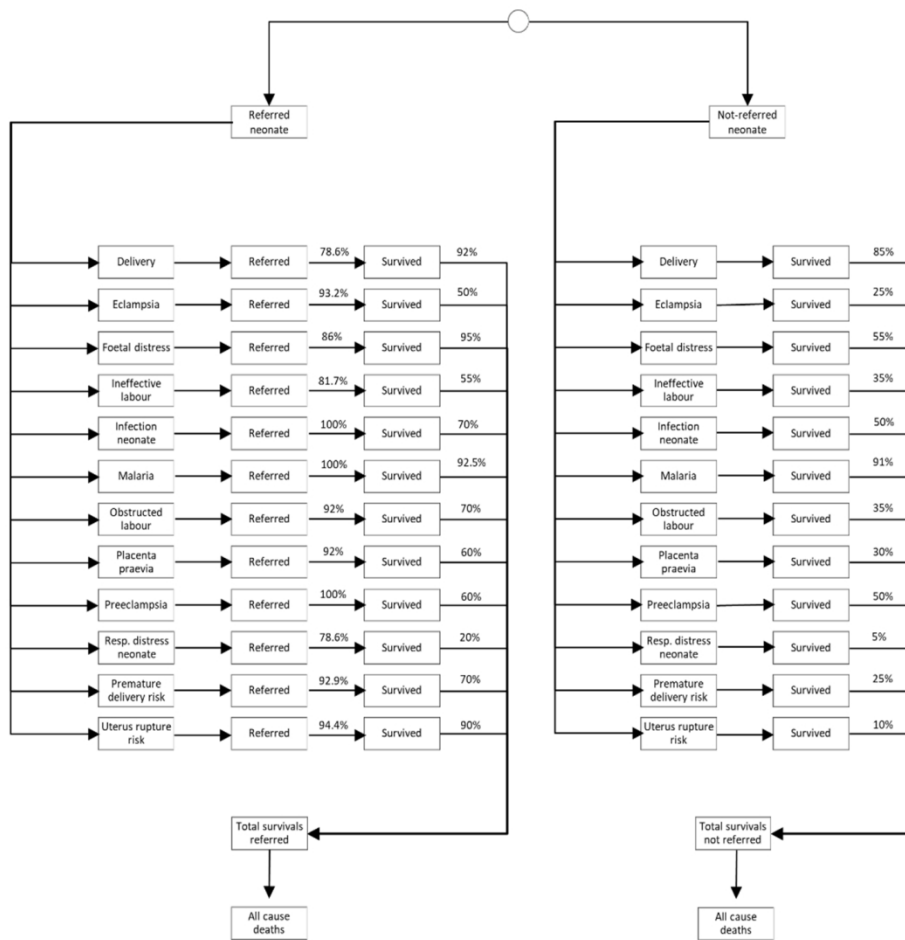

464x468mm (87 x 87 DPI)

Supplementary File 2: Investment costs

| Item                                                  | Cost per unit (USD) | Quantity |
|-------------------------------------------------------|---------------------|----------|
| <b>Ambulance</b>                                      |                     |          |
| Port charges, forwarding agent                        | 3,620               | 1        |
| Shipment from Japan to Madagascar including insurance | 3,020*              | 1        |
| Vehicle                                               | 38,254              | 1        |
| <u>Subtotal</u>                                       | 45,487              |          |
| <b>Equipment ambulance</b>                            |                     |          |
| Carpet                                                | 38                  | 1        |
| Fire extinguisher                                     | 26                  | 1        |
| Luggage rack                                          | 282                 | 1        |
| Mattress cover                                        | 54                  | 1        |
| Phone for ambulance                                   | 45                  | 1        |

| Item                     | Cost per unit (USD) | Quantity |
|--------------------------|---------------------|----------|
| Steering wheel cover     | 74                  | 1        |
| Tarpaulin                | 74                  | 1        |
| <u>Subtotal</u>          | 593                 |          |
| <b>Administration</b>    |                     |          |
| IT equipment, furniture) | 528                 | 1        |
| Mobile phone             | 45                  | 1        |
| <u>Subtotal</u>          | 573                 |          |
| <b><u>Total</u></b>      | <b>45,487</b>       |          |

Initial ambulance investment costs for 1 ambulance vehicle. Prices are expressed in USD with an exchange rate of 1 USD = 3,867.09 Malagasy Ariary (MGA) and 1 USD = 105.671 Japanese Yen (JPY) (costs marked \*).

Supplementary File 3: Running costs

| Item                                               | Cost per unit (USD)                      | Quantity                           | Annual costs (USD) |
|----------------------------------------------------|------------------------------------------|------------------------------------|--------------------|
| <b>Transport</b>                                   |                                          |                                    |                    |
| Fuel                                               | Average: 0.98 USD/l<br>(0.91/l – 1.03/l) | Average 1471<br>/months (961-2051) | 1,729              |
| Insurance                                          | 44                                       | 1                                  | 44                 |
| Licensing in Madagascar                            | 194                                      | 1                                  | 194                |
| Maintenance                                        | 1,707                                    | Yearly average                     | 1,707              |
| Repair                                             | 467                                      | Yearly average                     | 467                |
| <u>Subtotal</u>                                    |                                          |                                    | 4,141              |
| <b>Car equipment</b>                               |                                          |                                    |                    |
| Air chamber for tire                               | 72                                       | 4                                  | 288                |
| Cleaning equipment (shovel, broom, brush, scraper) | 13                                       | 1                                  | 13                 |
| Tires                                              | 142                                      | 4                                  | 568                |
| <u>Subtotal</u>                                    |                                          |                                    | 869                |

| <b>Item</b>                          | <b>Cost per unit (USD)</b> | <b>Quantity</b> | <b>Annual costs (USD)</b> |
|--------------------------------------|----------------------------|-----------------|---------------------------|
| <hr/>                                |                            |                 |                           |
| <b>Consumables</b>                   |                            |                 |                           |
| <hr/>                                |                            |                 |                           |
| Cleaning materials                   | 1                          | 12              | 12                        |
| Drugs on board ambulance             | 49                         | 12              | 588                       |
| Medical equipment on board ambulance | 36                         | 12              | 432                       |
| Oxygen bottle                        | 43                         | 1               | 43                        |
| <hr/>                                |                            |                 |                           |
| <u>Subtotal</u>                      |                            |                 | 1,075                     |
| <hr/>                                |                            |                 |                           |
| <b>Pre-transport care</b>            |                            |                 |                           |
| <hr/>                                |                            |                 |                           |
| Drugs and consumables                | 78                         | 6               | 468                       |
| <hr/>                                |                            |                 |                           |

| Item                                  | Cost per unit (USD)                       | Quantity | Annual costs (USD) |
|---------------------------------------|-------------------------------------------|----------|--------------------|
| <b>Staff wages</b>                    |                                           |          |                    |
| Drivers                               | Average:<br>116/months (range<br>103-129) | 12       | 1,392              |
| Local coordinator                     | 413/month                                 | 12       | 4,956              |
| Midwives                              | 155/month                                 | 12       | 1,860              |
| <u>Subtotal</u>                       |                                           |          | 8,208              |
| <b>Communication</b>                  |                                           |          |                    |
| Free phone number for ambulance calls | 9/month**                                 | 12       | 108                |
| Phone credits driver                  | 5/month                                   | 12       | 60                 |
| Phone credits coordination            | 8/month                                   | 12       | 96                 |
| SIM card for GPS tracking of vehicles | 10/month                                  | 12       | 120                |
| <u>Subtotal</u>                       |                                           |          | 384                |

| Item                                                                                         | Cost per unit (USD) | Quantity                 | Annual costs (USD) |
|----------------------------------------------------------------------------------------------|---------------------|--------------------------|--------------------|
| <b>Performance-based bonuses</b>                                                             |                     |                          |                    |
| Medical director of participating CSBs                                                       | 55                  | 12                       | 660                |
| <b>Item</b>                                                                                  |                     |                          |                    |
| <b>Cost per unit (USD)</b>                                                                   |                     |                          |                    |
| <b>Quantity</b>                                                                              |                     |                          |                    |
| <b>Annual costs (USD)</b>                                                                    |                     |                          |                    |
| Midwife of participating CSBs                                                                | 70                  | 12                       | 840                |
| Additional remuneration during ambulance services (staff on extra duty for at least 4 hours) | 4                   | Average: 20 times/months | 960                |
| <u>Subtotal</u>                                                                              |                     |                          | 2,460              |
| <b>Training activities</b>                                                                   |                     |                          |                    |
| Yearly training for drivers                                                                  | 297*                | 1                        | 297                |
| <b>Administration</b>                                                                        |                     |                          |                    |
| Consumables                                                                                  | 128                 | 12                       | 1,536              |
| Electricity                                                                                  | 15                  | 12                       | 180                |
| Rent                                                                                         | 155                 | 12                       | 1,860              |
| <u>Subtotal</u>                                                                              |                     |                          | 3,576              |

---

**Total annual running costs****21,478**

---

Annual running costs for 1 ambulance vehicle. Prices are expressed in USD with an exchange rate of 1 USD = 3,867.09 Malagasy Ariary (MGA) and 1 USD = 0.840618 Euros (costs marked \*).

\*\* on average, depending on the number of calls received

For peer review only



## CHEERS 2022 Checklist

|                                                                       | Item | Guidance for Reporting                                                                                                                                                      | Reported in section        |
|-----------------------------------------------------------------------|------|-----------------------------------------------------------------------------------------------------------------------------------------------------------------------------|----------------------------|
| <b>TITLE</b>                                                          |      |                                                                                                                                                                             |                            |
| Title                                                                 | 1    | Identify the study as an economic evaluation and specify the interventions being compared.                                                                                  | Page 1                     |
| <b>ABSTRACT</b>                                                       |      |                                                                                                                                                                             |                            |
| Abstract                                                              | 2    | Provide a structured summary that highlights context, key methods, results and alternative analyses.                                                                        | Pages 2-3                  |
| <b>INTRODUCTION</b>                                                   |      |                                                                                                                                                                             |                            |
| Background and objectives                                             | 3    | Give the context for the study, the study question and its practical relevance for decision making in policy or practice.                                                   | Pages 4-5                  |
| <b>METHODS</b>                                                        |      |                                                                                                                                                                             |                            |
| Health economic analysis plan                                         | 4    | Indicate whether a health economic analysis plan was developed and where available.                                                                                         | Page 9                     |
| Study population                                                      | 5    | Describe characteristics of the study population (such as age range, demographics, socioeconomic, or clinical characteristics).                                             | Page 7                     |
| Setting and location                                                  | 6    | Provide relevant contextual information that may influence findings.                                                                                                        | Pages 5-6                  |
| Comparators                                                           | 7    | Describe the interventions or strategies being compared and why chosen.                                                                                                     | Pages 5-7                  |
| Perspective                                                           | 8    | State the perspective(s) adopted by the study and why chosen.                                                                                                               | Page 10                    |
| Time horizon                                                          | 9    | State the time horizon for the study and why appropriate.                                                                                                                   | Page 7                     |
| Discount rate                                                         | 10   | Report the discount rate(s) and reason chosen.                                                                                                                              | Page 15                    |
| Selection of outcomes                                                 | 11   | Describe what outcomes were used as the measure(s) of benefit(s) and harm(s).                                                                                               | Pages 9-10                 |
| Measurement of outcomes                                               | 12   | Describe how outcomes used to capture benefit(s) and harm(s) were measured.                                                                                                 | Page 15                    |
| Valuation of outcomes                                                 | 13   | Describe the population and methods used to measure and value outcomes.                                                                                                     | Pages 10-15                |
| Measurement and valuation of resources and costs                      | 14   | Describe how costs were valued.                                                                                                                                             | Pages 8-9                  |
| Currency, price date, and conversion                                  | 15   | Report the dates of the estimated resource quantities and unit costs, plus the currency and year of conversion.                                                             | Page 8-9                   |
| Rationale and description of model                                    | 16   | If modelling is used, describe in detail and why used. Report if the model is publicly available and where it can be accessed.                                              | Pages 10-15                |
| Analytics and assumptions                                             | 17   | Describe any methods for analysing or statistically transforming data, any extrapolation methods, and approaches for validating any model used.                             | Pages 11, 15               |
| Characterizing heterogeneity                                          | 18   | Describe any methods used for estimating how the results of the study vary for sub-groups.                                                                                  | Page 15                    |
| Characterizing distributional effects                                 | 19   | Describe how impacts are distributed across different individuals or adjustments made to reflect priority populations.                                                      |                            |
| Characterizing uncertainty                                            | 20   | Describe methods to characterize any sources of uncertainty in the analysis.                                                                                                | Pages 11, 15               |
| Approach to engagement with patients and others affected by the study | 21   | Describe any approaches to engage patients or service recipients, the general public, communities, or stakeholders (e.g., clinicians or payers) in the design of the study. | Pages 11-12                |
| <b>RESULTS</b>                                                        |      |                                                                                                                                                                             |                            |
| Study parameters                                                      | 22   | Report all analytic inputs (e.g., values, ranges, references) including uncertainty or distributional assumptions.                                                          | Pages 12-15, 18-20, Suppl. |
| Summary of main results                                               | 23   | Report the mean values for the main categories of costs and outcomes of interest and summarise them in the most appropriate overall measure.                                | Pages 20-23                |
| Effect of uncertainty                                                 | 24   | Describe how uncertainty about analytic judgments, inputs, or projections affect findings. Report the effect of choice of discount rate and time horizon, if applicable.    | Pages 23-24                |
| Effect of engagement with patients and others affected by the study   | 25   | Report on any difference patient/service recipient, general public, community, or stakeholder involvement made to the approach or findings of the study                     | Pages 11-12                |
| <b>DISCUSSION</b>                                                     |      |                                                                                                                                                                             |                            |
| Study findings, limitations, generalizability, and current knowledge  | 26   | Report key findings, limitations, ethical or equity considerations not captured, and how these could impact patients, policy, or practice.                                  | P. 25-27                   |
| <b>OTHER RELEVANT INFORMATION</b>                                     |      |                                                                                                                                                                             |                            |
| Source of funding                                                     | 27   | Describe how the study was funded and any role of the funder in the identification, design, conduct, and reporting of the analysis                                          | Page 3                     |
| Conflicts of interest                                                 | 28   | Report authors conflicts of interest according to journal or International Committee of Medical Journal Editors requirements.                                               | Page 3                     |

Husereau D, Drummond M, Augustovski F, de Bekker-Grob E, Briggs AH, Carswell C, Caulley L, Chaiyakunapruk N, Greenberg D, Loder E, Mauskopf J, Mullins CD, Petrou S, Pwu RF, Staniszezwska S; CHEERS 2022 ISPOR Good Research Practices Task Force. Consolidated Health Economic Evaluation Reporting Standards 2022 (CHEERS 2022) Statement: Updated Reporting Guidance for Health Economic Evaluations. *BMJ*. 2022;376:e067975.

The checklist is Open Access distributed in accordance with the terms of the Creative Commons Attribution (CC BY 4.0) license, which permits others to distribute, remix, adapt and build upon this work, for commercial use, provided the original work is properly cited. See: <http://creativecommons.org/licenses/by/4.0/>.
