# Supplementary material for: Inter-facility transfers for emergency obstetrical and neonatal care in rural Madagascar: a cost-effectiveness analysis
Source: PubMed Central journal article supplement — BMJ Open. 2024 Apr 3;14(4):e081482. doi: 10.1136/bmjopen-2023-081482 (PMC11146390; doi:10.1136/bmjopen-2023-081482), 2024-04-03
Supplement: bmjopen-2023-081482supp001.pdf [file bmjopen-2023-081482supp001.pdf]

Supplementary File 1: Ambulance furnishings**Medical equipment****Drugs**

- 
- |                                                                                                                                                                                                                                                                                                                                                                                                                                                       |                                                                                                                                                                                                                                                                                                                                                                                                                                                                                                                                                                                                                                                                                                                                                                                                                                                                  |
|-------------------------------------------------------------------------------------------------------------------------------------------------------------------------------------------------------------------------------------------------------------------------------------------------------------------------------------------------------------------------------------------------------------------------------------------------------|------------------------------------------------------------------------------------------------------------------------------------------------------------------------------------------------------------------------------------------------------------------------------------------------------------------------------------------------------------------------------------------------------------------------------------------------------------------------------------------------------------------------------------------------------------------------------------------------------------------------------------------------------------------------------------------------------------------------------------------------------------------------------------------------------------------------------------------------------------------|
| <ul style="list-style-type: none"><li>● Alcohol</li><li>● Betadine</li><li>● Blood sugar testing strips</li><li>● Cord clamps</li><li>● Echography gel</li><li>● Intravenous catheters</li><li>● Non-sterile compresses</li><li>● Non-sterile gloves</li><li>● IV lines</li><li>● Plasters</li><li>● Pregnancy test</li><li>● Sterile compresses</li><li>● Sterile gloves</li><li>● Ultrasound machine</li><li>● Urinary catheters and bags</li></ul> | <ul style="list-style-type: none"><li>● Analgesics<ul style="list-style-type: none"><li>○ Paracetamol</li></ul></li><li>● Antibiotics<ul style="list-style-type: none"><li>○ Ampicillin</li><li>○ Amoxicillin</li></ul></li><li>● Antihypertensive agents<ul style="list-style-type: none"><li>○ Magnesium Sulphate</li><li>○ Nicardipine</li></ul></li><li>● Infusion solutions<ul style="list-style-type: none"><li>○ Isotonic Glucose solution</li><li>○ Isotonic saline</li><li>○ Lactated Ringer's</li><li>○ Sodium Chloride</li></ul></li><li>● Uterotonic agents<ul style="list-style-type: none"><li>○ Misoprostol</li><li>○ Oxytocin</li></ul></li><li>● Other<ul style="list-style-type: none"><li>○ Calcium gluconate</li><li>○ Diazepam</li><li>○ Paracetamol</li><li>○ Salbutamol</li><li>○ Tranexamic acid</li><li>○ Vitamin K</li></ul></li></ul> |
|-------------------------------------------------------------------------------------------------------------------------------------------------------------------------------------------------------------------------------------------------------------------------------------------------------------------------------------------------------------------------------------------------------------------------------------------------------|------------------------------------------------------------------------------------------------------------------------------------------------------------------------------------------------------------------------------------------------------------------------------------------------------------------------------------------------------------------------------------------------------------------------------------------------------------------------------------------------------------------------------------------------------------------------------------------------------------------------------------------------------------------------------------------------------------------------------------------------------------------------------------------------------------------------------------------------------------------|
- 

Medical equipment and drugs available aboard ambulance vehicles.
