# Supplementary material for: Inter-facility transfers for emergency obstetrical and neonatal care in rural Madagascar: a cost-effectiveness analysis
Source: PubMed Central journal article supplement — BMJ Open. 2024 Apr 3;14(4):e081482. doi: 10.1136/bmjopen-2023-081482 (PMC11146390; doi:10.1136/bmjopen-2023-081482), 2024-04-03
Supplement: bmjopen-2023-081482supp004.pdf [file bmjopen-2023-081482supp004.pdf]

Supplementary File 2: Investment costs

| <b>Item</b>                                           | <b>Cost per unit (USD)</b> | <b>Quantity</b> |
|-------------------------------------------------------|----------------------------|-----------------|
| <hr/> <b>Ambulance</b> <hr/>                          |                            |                 |
| Port charges, forwarding agent                        | 3,620                      | 1               |
| Shipment from Japan to Madagascar including insurance | 3,020*                     | 1               |
| Vehicle                                               | 38,254                     | 1               |
| <hr/>                                                 |                            |                 |
| <u>Subtotal</u>                                       | 45,487                     |                 |
| <hr/>                                                 |                            |                 |
| <b>Equipment ambulance</b> <hr/>                      |                            |                 |
| Carpet                                                | 38                         | 1               |
| Fire extinguisher                                     | 26                         | 1               |
| Luggage rack                                          | 282                        | 1               |
| Mattress cover                                        | 54                         | 1               |
| Phone for ambulance                                   | 45                         | 1               |
| <hr/>                                                 |                            |                 |

---

| <b>Item</b>              | <b>Cost per unit (USD)</b> | <b>Quantity</b> |
|--------------------------|----------------------------|-----------------|
| Steering wheel cover     | 74                         | 1               |
| Tarpaulin                | 74                         | 1               |
| <u>Subtotal</u>          | 593                        |                 |
| <b>Administration</b>    |                            |                 |
| IT equipment, furniture) | 528                        | 1               |
| Mobile phone             | 45                         | 1               |
| <u>Subtotal</u>          | 573                        |                 |
| <b><u>Total</u></b>      | <b>45,487</b>              |                 |

---

Initial ambulance investment costs for 1 ambulance vehicle. Prices are expressed in USD with an exchange rate of 1 USD = 3,867.09 Malagasy Ariary (MGA) and 1 USD = 105.671 Japanese Yen (JPY) (costs marked \*).
