# Supplementary material for: Inter-facility transfers for emergency obstetrical and neonatal care in rural Madagascar: a cost-effectiveness analysis
Source: PubMed Central journal article supplement — BMJ Open. 2024 Apr 3;14(4):e081482. doi: 10.1136/bmjopen-2023-081482 (PMC11146390; doi:10.1136/bmjopen-2023-081482), 2024-04-03
Supplement: bmjopen-2023-081482supp005.pdf [file bmjopen-2023-081482supp005.pdf]

Supplementary File 3: Running costs

| <b>Item</b>                                        | <b>Cost per unit (USD)</b>               | <b>Quantity</b>                    | <b>Annual costs (USD)</b> |
|----------------------------------------------------|------------------------------------------|------------------------------------|---------------------------|
| <b>Transport</b>                                   |                                          |                                    |                           |
| Fuel                                               | Average: 0.98 USD/l<br>(0.91/l – 1.03/l) | Average 147l<br>/months (961-2051) | 1,729                     |
| Insurance                                          | 44                                       | 1                                  | 44                        |
| Licensing in Madagascar                            | 194                                      | 1                                  | 194                       |
| Maintenance                                        | 1,707                                    | Yearly average                     | 1,707                     |
| Repair                                             | 467                                      | Yearly average                     | 467                       |
| <u>Subtotal</u>                                    |                                          |                                    | 4,141                     |
| <b>Car equipment</b>                               |                                          |                                    |                           |
| Air chamber for tire                               | 72                                       | 4                                  | 288                       |
| Cleaning equipment (shovel, broom, brush, scraper) | 13                                       | 1                                  | 13                        |
| Tires                                              | 142                                      | 4                                  | 568                       |
| <u>Subtotal</u>                                    |                                          |                                    | 869                       |

| <b>Item</b>                           | <b>Cost per unit (USD)</b> | <b>Quantity</b> | <b>Annual costs (USD)</b> |
|---------------------------------------|----------------------------|-----------------|---------------------------|
| <hr/> <b>Consumables</b> <hr/>        |                            |                 |                           |
| Cleaning materials                    | 1                          | 12              | 12                        |
| Drugs on board ambulance              | 49                         | 12              | 588                       |
| Medical equipment on board ambulance  | 36                         | 12              | 432                       |
| Oxygen bottle                         | 43                         | 1               | 43                        |
| <hr/> <u>Subtotal</u>                 |                            |                 | 1,075                     |
| <hr/> <b>Pre-transport care</b> <hr/> |                            |                 |                           |
| Drugs and consumables                 | 78                         | 6               | 468                       |

| <b>Item</b>                           | <b>Cost per unit (USD)</b>          | <b>Quantity</b> | <b>Annual costs (USD)</b> |
|---------------------------------------|-------------------------------------|-----------------|---------------------------|
| <b>Staff wages</b>                    |                                     |                 |                           |
| Drivers                               | Average: 116/months (range 103-129) | 12              | 1,392                     |
| Local coordinator                     | 413/month                           | 12              | 4,956                     |
| Midwives                              | 155/month                           | 12              | 1,860                     |
| <u>Subtotal</u>                       |                                     |                 | 8,208                     |
| <b>Communication</b>                  |                                     |                 |                           |
| Free phone number for ambulance calls | 9/month**                           | 12              | 108                       |
| Phone credits driver                  | 5/month                             | 12              | 60                        |
| Phone credits coordination            | 8/month                             | 12              | 96                        |
| SIM card for GPS tracking of vehicles | 10/month                            | 12              | 120                       |
| <u>Subtotal</u>                       |                                     |                 | 384                       |

| Item                                                                                         | Cost per unit (USD)        | Quantity                 | Annual costs (USD)        |
|----------------------------------------------------------------------------------------------|----------------------------|--------------------------|---------------------------|
| <b>Performance-based bonuses</b>                                                             |                            |                          |                           |
| Medical director of participating CSBs                                                       | 55                         | 12                       | 660                       |
| <b>Item</b>                                                                                  |                            |                          |                           |
|                                                                                              | <b>Cost per unit (USD)</b> | <b>Quantity</b>          | <b>Annual costs (USD)</b> |
| Midwife of participating CSBs                                                                | 70                         | 12                       | 840                       |
| Additional remuneration during ambulance services (staff on extra duty for at least 4 hours) | 4                          | Average: 20 times/months | 960                       |
| <u>Subtotal</u>                                                                              |                            |                          | 2,460                     |
| <b>Training activities</b>                                                                   |                            |                          |                           |
| Yearly training for drivers                                                                  | 297*                       | 1                        | 297                       |
| <b>Administration</b>                                                                        |                            |                          |                           |
| Consumables                                                                                  | 128                        | 12                       | 1,536                     |
| Electricity                                                                                  | 15                         | 12                       | 180                       |
| Rent                                                                                         | 155                        | 12                       | 1,860                     |
| <u>Subtotal</u>                                                                              |                            |                          | 3,576                     |

---

|                                          |               |
|------------------------------------------|---------------|
| <b><u>Total annual running costs</u></b> | <b>21,478</b> |
|------------------------------------------|---------------|

---

Annual running costs for 1 ambulance vehicle. Prices are expressed in USD with an exchange rate of 1 USD = 3,867.09 Malagasy Ariary (MGA) and 1 USD = 0.840618 Euros (costs marked \*).

\*\* on average, depending on the number of calls received
