# Supplementary figures and images for: Inter-facility transfers for emergency obstetrical and neonatal care in rural Madagascar: a cost-effectiveness analysis
Source: PubMed Central journal article supplement — BMJ Open. 2024 Apr 3;14(4):e081482. doi: 10.1136/bmjopen-2023-081482 (PMC11146390; doi:10.1136/bmjopen-2023-081482), 2024-04-03

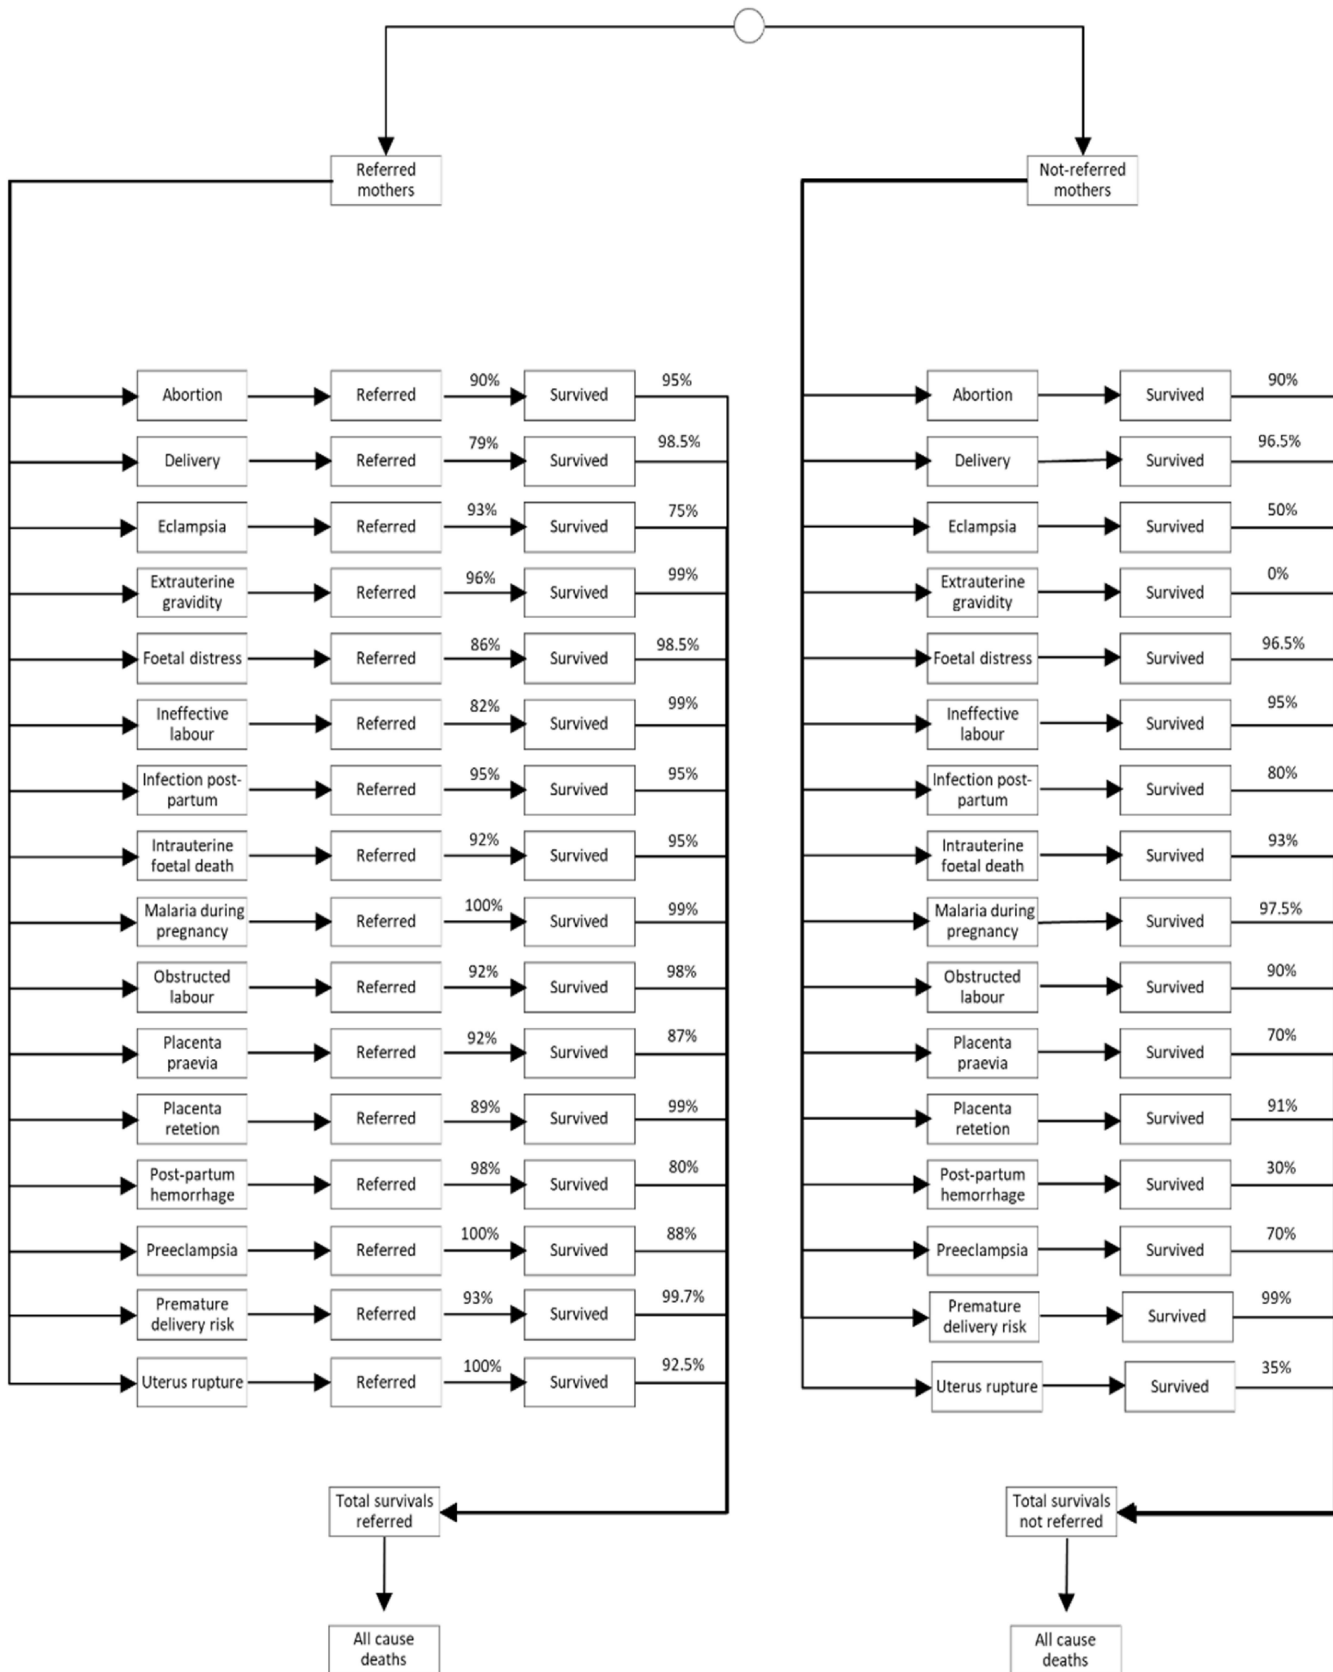

Supplement: bmjopen-2023-081482supp002.pdf [file bmjopen-2023-081482supp002.pdf]

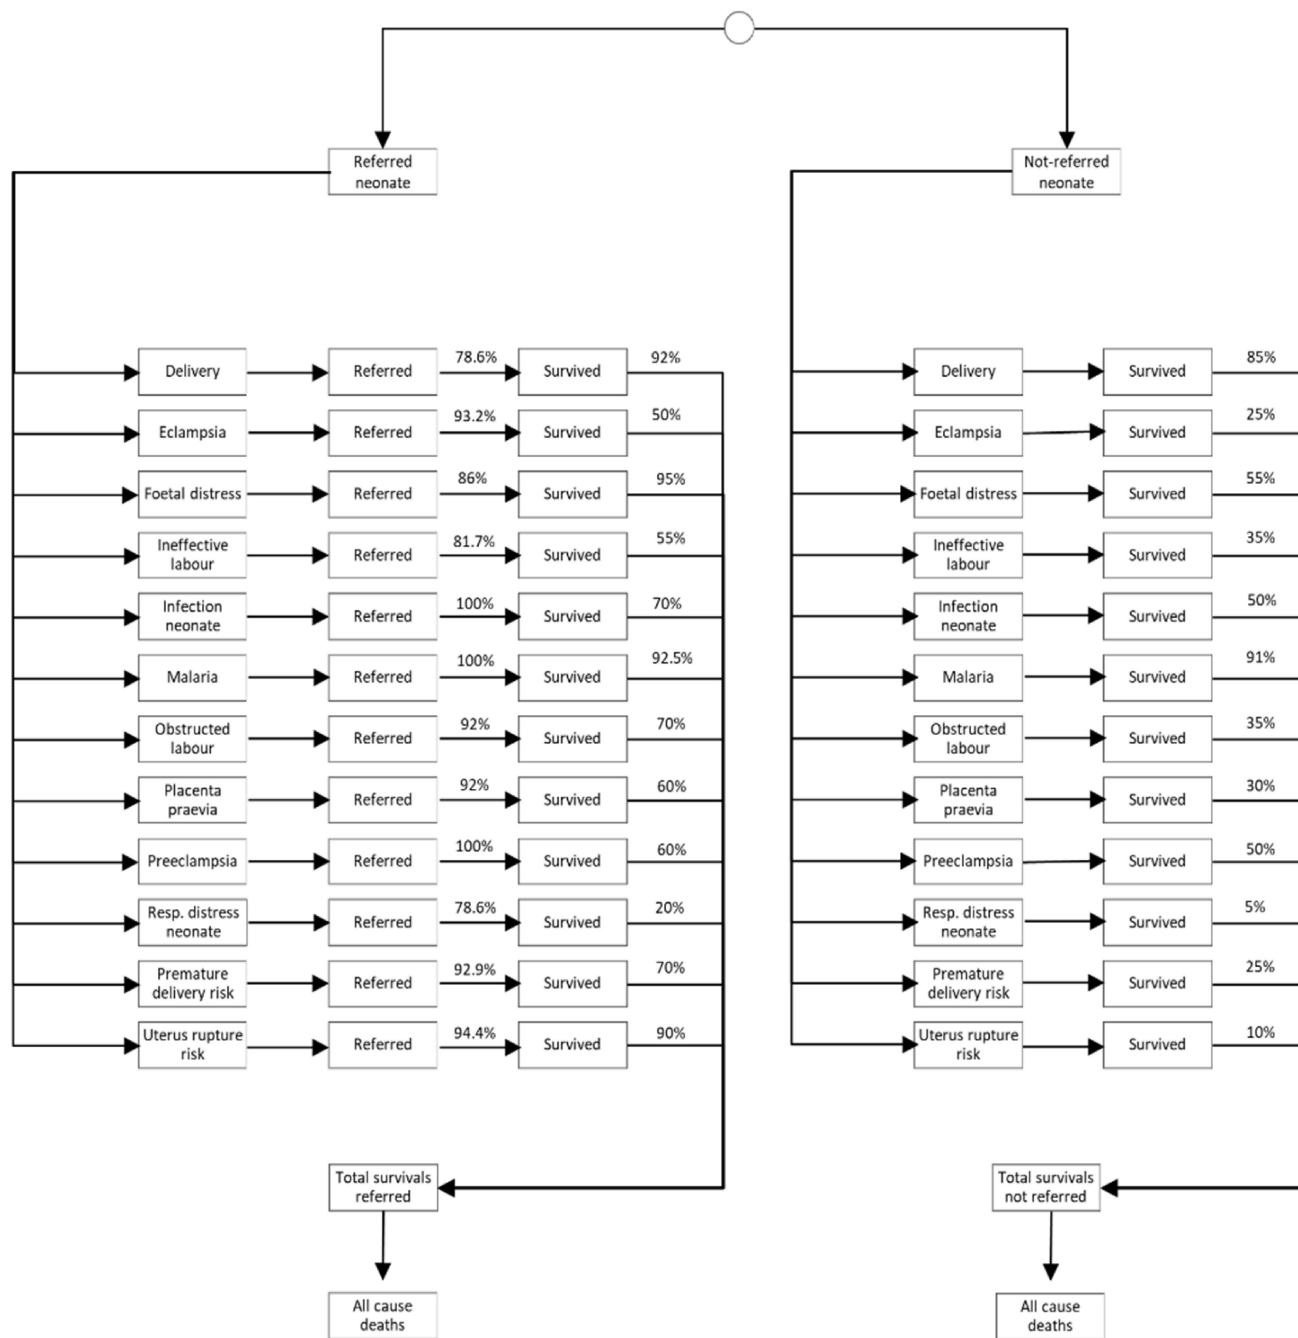

Supplement: bmjopen-2023-081482supp003.pdf [file bmjopen-2023-081482supp003.pdf]
